# Supplementary material for: An active machine learning discovery platform for membrane-disrupting and pore-forming peptides
Source: Royal Society of Chemistry journal article supplement (doi:10.1039/d4cp01404a), 2024-01-01
Supplement: d4cp01404a1.pdf [file d4cp01404a1.pdf]

## Supplemental Information for

### **An Active Machine Learning Discovery Platform for Pore-forming Peptides**

Alexander van Teijlingen<sup>1</sup>, Daniel Edwards<sup>2</sup>, Liao Hu<sup>2</sup>, Annamaria Lilienkampf<sup>2</sup>, Scott L. Cockroft<sup>2</sup> and Tell Tuttle<sup>1\*</sup>

<sup>1</sup>Pure and Applied Chemistry, University of Strathclyde, 295 Cathedral Street, Glasgow, G1 1XL, UK.

<sup>2</sup>Department of Chemistry, University of Edinburgh, David Brewster Road, Edinburgh, EH9 3FJ, UK.

Corresponding author: [tell.tuttle@strath.ac.uk](mailto:tell.tuttle@strath.ac.uk)

## Table of Contents

|                                                                                         |    |
|-----------------------------------------------------------------------------------------|----|
| 1. Experimental Procedures .....                                                        | 3  |
| 1.1 Peptide synthesis .....                                                             | 3  |
| 1.2 Planar lipid bilayer pore formation experiments .....                               | 3  |
| 1.3 FFMSRIFF, experimental pore-formation with alternative ions and phospholipids ..... | 6  |
| 2. Computational Simulations .....                                                      | 14 |
| 2.1 Coarse-grained molecular dynamics .....                                             | 14 |
| 2.2 Steered coarse-grained molecular dynamics .....                                     | 14 |
| 2.2.1 SMD repeatability .....                                                           | 15 |
| 2.3 Constant pH molecular dynamics .....                                                | 15 |
| 2.4 Pore-formation <i>via</i> CpHMD .....                                               | 16 |
| 2.5 APL as a metric .....                                                               | 17 |
| 2.6 Phospholipid bilayers vs stands-ins. ....                                           | 19 |
| 3. Machine learning / Artificial intelligence .....                                     | 19 |
| 3.1 Active learning cycle .....                                                         | 19 |
| 3.2 Machine learning peptide descriptors .....                                          | 20 |
| 3.3 Machine learning results .....                                                      | 21 |
| 3.3.1 Machine learning model improvement over time .....                                | 28 |
| 3.4 Machine learning acceleration .....                                                 | 29 |
| 4. Data underpinning this publication .....                                             | 30 |
| 5. Supplemental References .....                                                        | 30 |

## 1. Experimental Procedures

### 1.1 Peptide synthesis

The peptides were synthesized on a Wang-linker functionalized polystyrene resin using standard Fmoc chemistry. The crude peptides were purified by semi-preparative RP-HPLC. The lyophilized peptides were characterized by analytical RP-HPLC and MALDI-ToF or ESI MS (Table S1).

**Table S1.** Peptide characterization by RP-HPLC and MS.

| Peptide | Sequence | HPLC ( $t_R$ min) <sup>a</sup> | Purity (%) | [M+H] <sup>+</sup> <sup>b</sup> |
|---------|----------|--------------------------------|------------|---------------------------------|
| 1       | FFFLSRIF | 3.4                            | 94         | 1076.63                         |
| 2       | GSGTGSGT | 0.8                            | 99         | 623.30 <sup>c</sup>             |
| 3       | CFTYFFRV | 3.0                            | 99         | 1082.71                         |
| 4       | VCVYWVRT | 3.7                            | 95         | 1112.76                         |
| 5       | FGYVLIRI | 3.1                            | 97         | 980.79                          |
| 6       | LSFMRFFF | 3.4                            | 99         | 1094.66                         |
| 7       | SAFWWFRF | 3.5                            | 99         | 1146.83                         |
| 8       | HGLFWWRF | 3.1                            | 99         | 1148.84                         |
| 9       | GIALKIVW | 3.9                            | 95         | 899.58                          |
| 10      | YCVLRLPF | 3.2                            | 97         | 1010.76                         |
| 11      | FFMSIRFF | 3.4                            | 98         | 1094.79                         |
| 12      | FFIMRFFS | 3.4                            | 99         | 1094.55                         |
| 13      | FFRISMFF | 3.4                            | 99         | 1094.63                         |

<sup>a</sup> Detection at 220 nm; <sup>b</sup> MALDI-ToF MS; <sup>c</sup> ESI-MS

### 1.2 Planar lipid bilayer pore formation experiments

The ability of the peptides to disrupt a bilayer was then investigated by measuring the amount of current that could flow across the bilayer. Planar lipid bilayer recordings were performed in a custom Teflon cell equipped with two 1 mL compartments separated by a 20  $\mu\text{m}$  thick Teflon film (Goodfellow) with an  $\sim 100$   $\mu\text{m}$  diameter aperture (Figure S1). A hanging drop of hexadecane in *n*-pentane (5  $\mu\text{L}$ , 10%, v/v) was touched on each side of the Teflon sheet containing an aperture and allowed to dry for 1 min. The cell was placed into a Faraday cage, and Ag/AgCl electrodes (Warner) connected to a patch clamp amplifier (Axopatch 200B, Molecular Devices) were suspended either side of the Teflon sheet. KCl/MOPS buffer (600  $\mu\text{L}$ ) was added to the well on each side of the aperture. POPC lipid (1-palmitoyl-2-oleoyl-*sn*-glycero-3-phosphocholine) (approximately 8  $\mu\text{L}$ , 5  $\mu\text{g}$   $\mu\text{L}^{-1}$  in *n*-pentane) was added to each side of the well and left for  $\sim 5$  min to allow the pentane to evaporate. The buffer solution on both sides of the Teflon sheet was aspirated and dispensed using a Hamilton syringe to paint a phospholipid bilayer across the aperture. A  $\pm 1$  mV pulse was applied at 1333 Hz to determine when a bilayer was obtained (capacitance  $> 40$  pF).

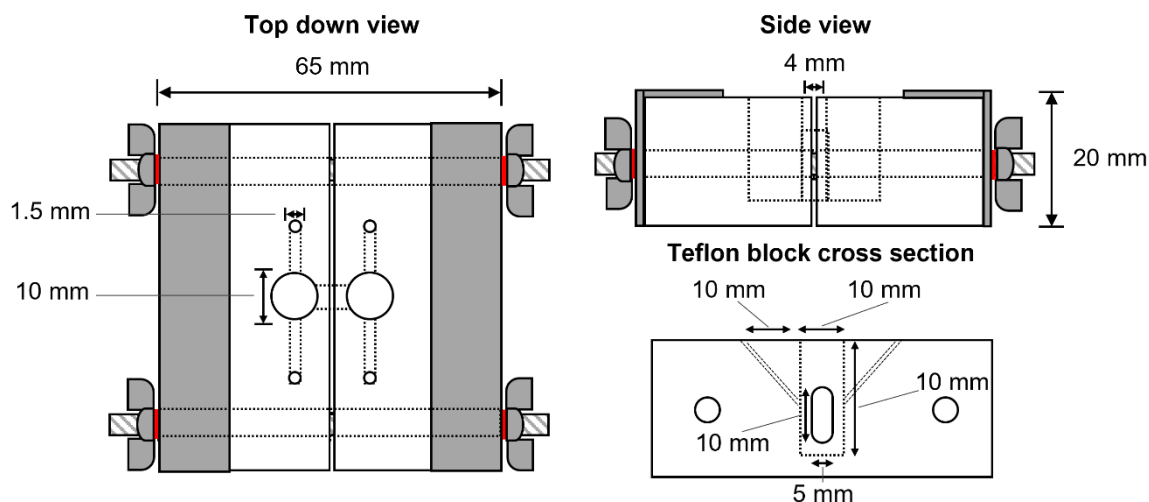

**Supplemental Figure S1 Diagram of custom cell for planar lipid bilayer experiments.** The cell consists of two mirror image Teflon blocks. Each block has a well bored into it, with a perpendicular channel connecting the two wells. Each well has two mitred channels at a 45° to allow for ease of access to the buffered well during experimentation. The blocks were held together using metal brackets. A tight seal was ensured by using silicon glue.

The membrane was characterized with successive 2 s sweeps under an applied potential ranging from +100 to -100 mV (Figure S2). The membrane seal was deemed acceptable if the range of current flow across the membrane measured <1 pA. Under an applied voltage (+10 mV), a solution of peptide (10  $\mu$ L of a 50  $\mu$ M solution, final concentration  $\sim$ 0.8  $\mu$ M) was added to the *trans* well of a membrane-containing system.

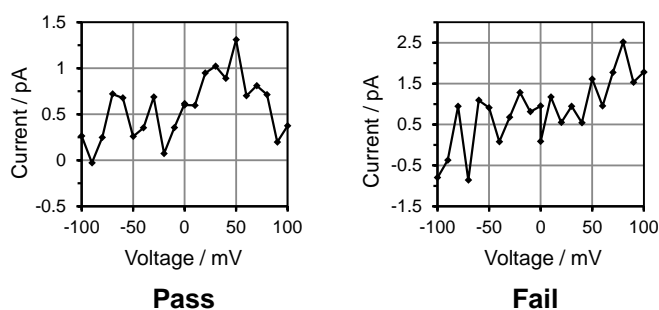

**Supplemental Figure S2 Characterization of POPC Membranes.** In order to interrogate the quality of the formed POPC bilayer a characterization is carried out by means of an IV sweep between the range -100 mV and +100 mV in 10 mV increments over 2 second sweeps. This protocol is repeated six times, and a mean average is calculated of the current at each value of voltage. A membrane with current flow deviation <1.5 pA is considered a pass and used for experiments, as demonstrated (left). In the case that there is current flow deviation >1.5 pA (as on right) this is considered a pass, and the membrane is zapped and reformed and the process repeated.

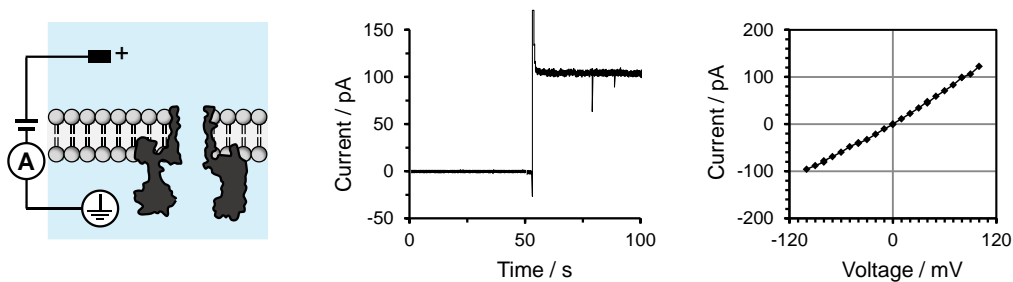

**Supplemental Figure S3 Evidence of bilayer formation by insertion of  $\alpha$ -HL transmembrane protein nanopore.**

Addition of  $\alpha$ -HL ( $\sim 0.2 \mu\text{M}$ ) to a stable POPC phospholipid bilayer to isolate a single transmembrane channel (left). Current trace of channel insertion added to the ground well under a positive applied potential difference (+100 mV) in buffer (1 M KCl, 10 mM MOPS, pH 7.4) (middle). Current traces acquired at 2 kHz lowpass Bessel filter and x 50 output gain. Current voltage relationship of obtained  $\alpha$ -HL single transmembrane channel stepwise from -100 mV to +100 mV (right).

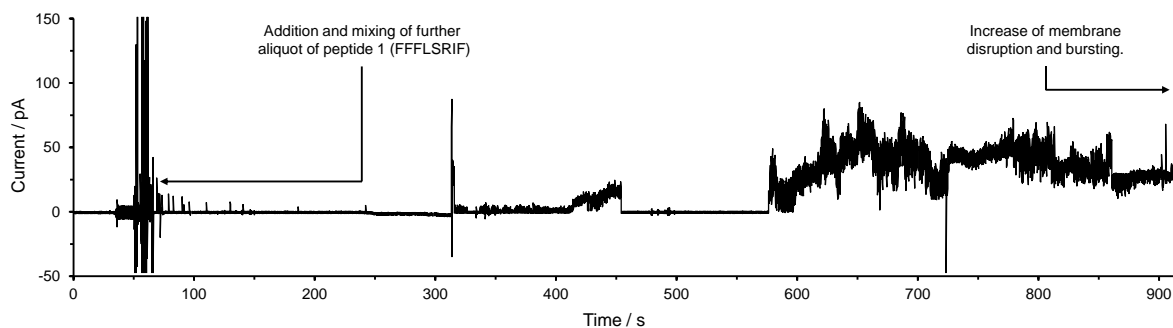

**Supplemental Figure S4 Positive control peptide 1 FFFLSRIF.** Current traces of membrane disruption with peptide 1 (FFFLSRIF) using 1 M KCl, 10 mM MOPS, pH 7.4. Current traces acquired at 2 kHz lowpass Bessel filter and x 50 output gain. Membrane formed using DPhPC.

## Supporting Information for: An Active Machine Learning Discovery Platform for Membrane-Disrupting and Pore-forming Peptides.

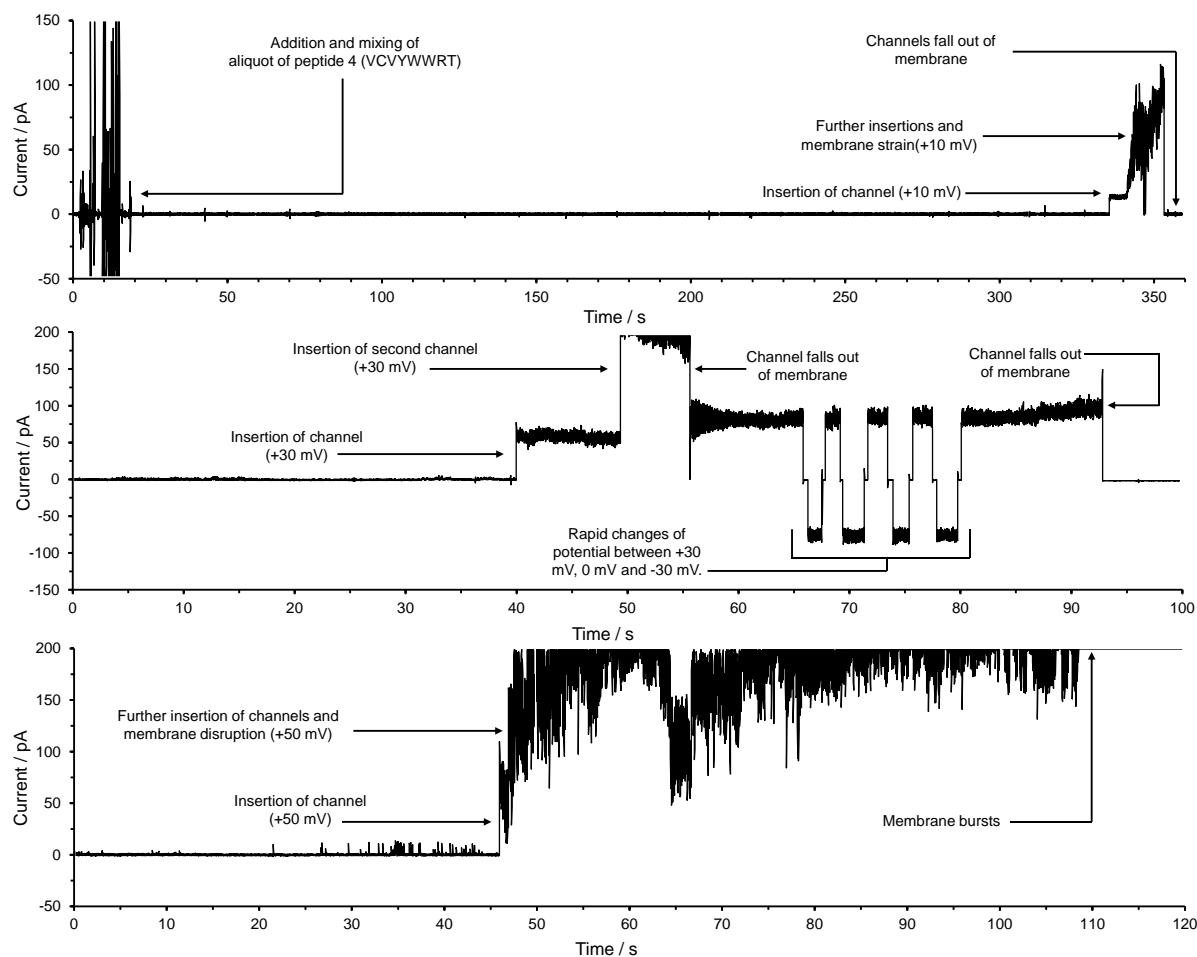

**Supplemental Figure S5 Peptide 4 channel forming behavior.** Current traces of membrane disruption with peptide 4 (VCVYWWRT) using 1 M KCl, 10 mM MOPS, pH 7.4. Current traces acquired at 2 kHz lowpass Bessel filter and x 50 output gain. Traces visualized with lowpass filter type (Gaussian) with 750 Hz cut-off. Varying insertions observed at +10 mV (top), +30 mV (middle) and +50 mV (bottom) eventually leading to the membrane bursting.

### 1.3 FFMSRIFF, experimental pore-formation with alternative ions and phospholipids

Membrane disruption sustained with variation of buffer components from KCl to NaCl and CsCl but stability of the channels was greatly decreased (Figure S6). Channel-like behavior was preserved with alternative phospholipid 1,2-diphytanoyl-*sn*-glycero-3-phosphocholine (DPhPC), a more prevalent candidate for single-channel studies as a result of increased stability over POPC<sup>1</sup> (Figure S7).

Supporting Information for: An Active Machine Learning Discovery Platform for Membrane-Disrupting and Pore-forming Peptides.

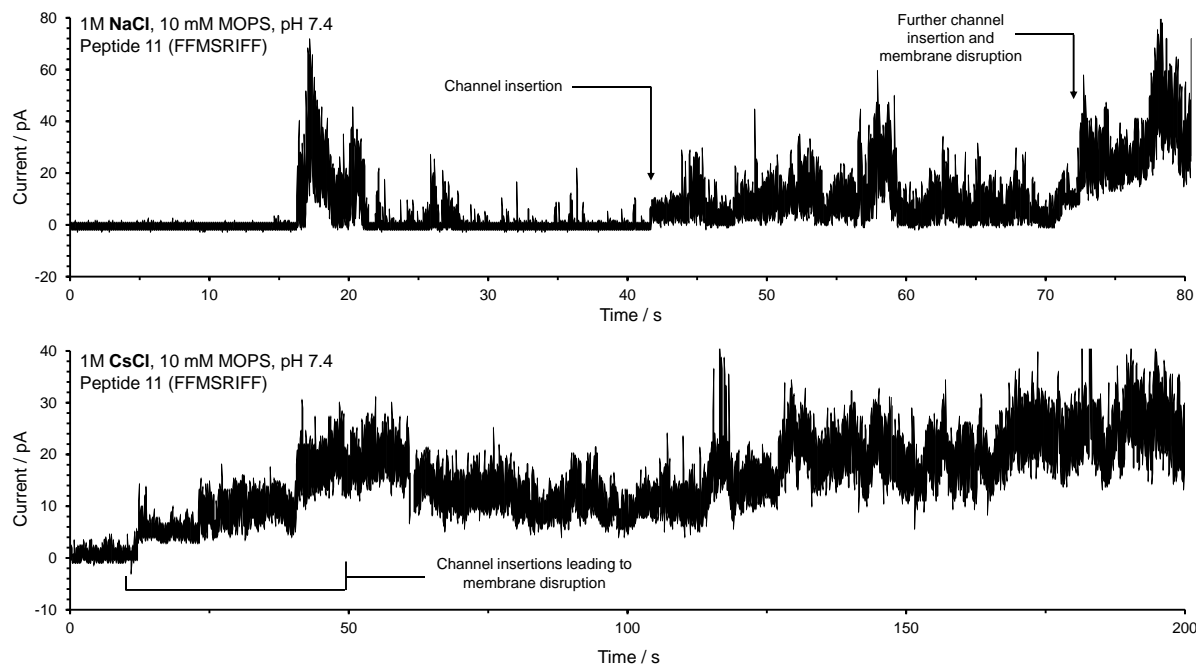

**Supplemental Figure S6 Membrane disruption observed with octapeptide 11 FFMSIRFF under varying buffer concentration.** Current traces of membrane disruption with peptide 11 (FFMSRIFF) using 1 M NaCl (top) and 1M CsCl (bottom) with 10 mM MOPS, pH 7.4. Current traces acquired at 2 kHz lowpass Bessel filter and x 50 output gain.

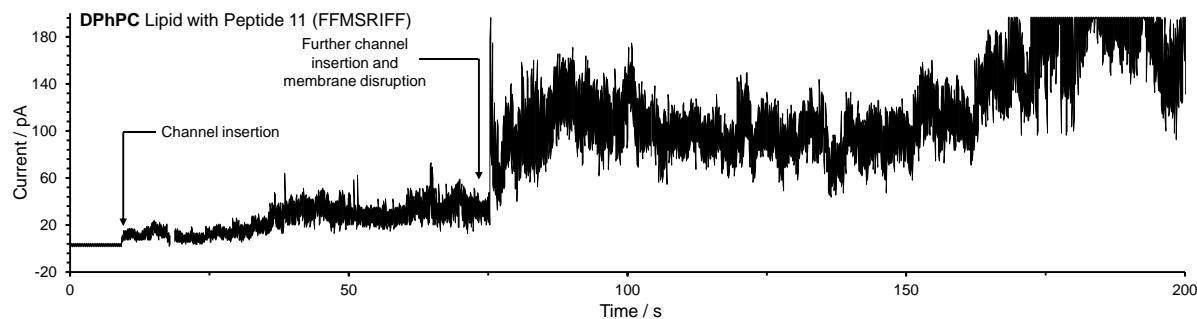

**Supplemental Figure S7 Membrane disruption observed with octapeptide 11 FFMSIRFF with DPhPC lipid.** Current traces of membrane disruption with peptide 11 (FFMSRIFF) using 1 KCl, 10 mM MOPS, pH 7.4. Current traces acquired at 2 kHz lowpass Bessel filter and x 50 output gain. Membrane formed using DPhPC.

Supporting Information for: An Active Machine Learning Discovery Platform for Membrane-Disrupting and Pore-forming Peptides.

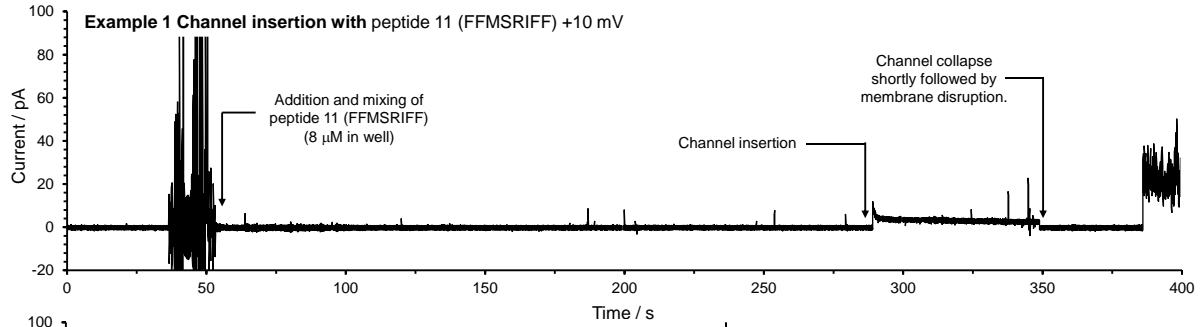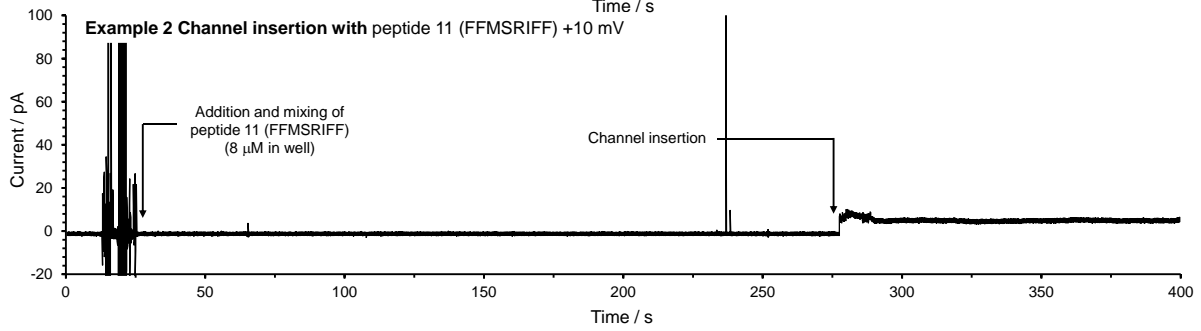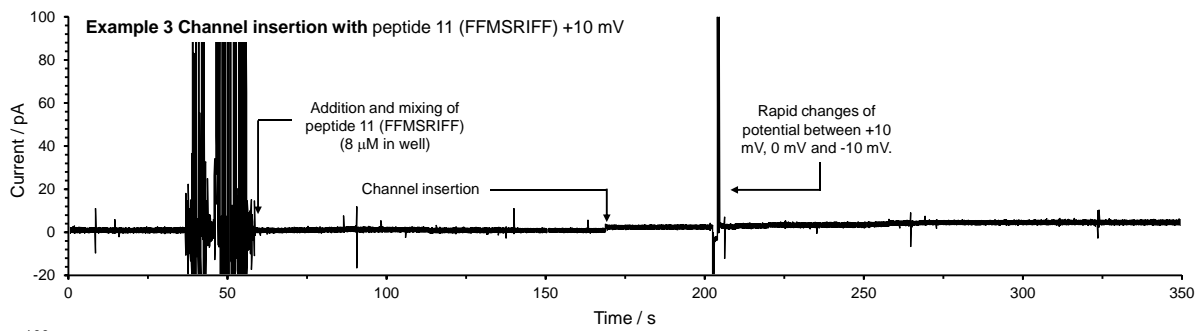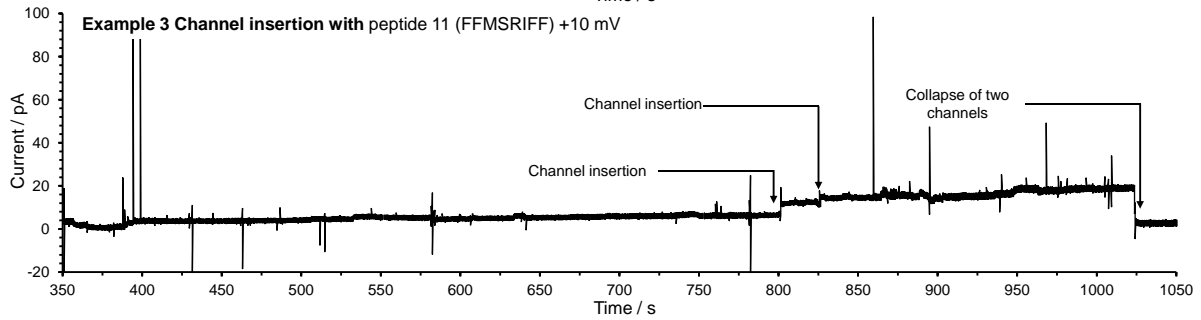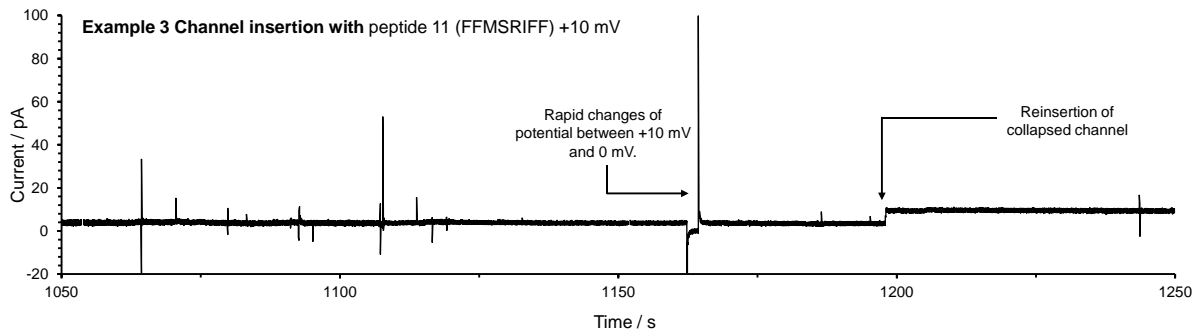



Supporting Information for: An Active Machine Learning Discovery Platform for Membrane-Disrupting and Pore-forming Peptides.

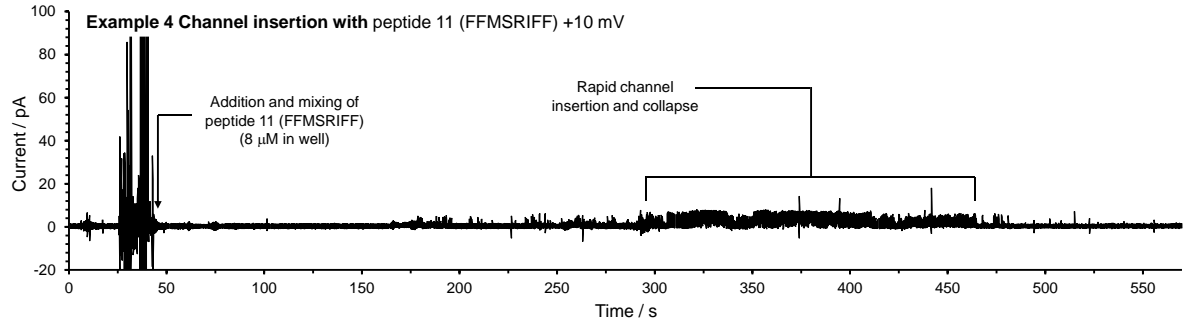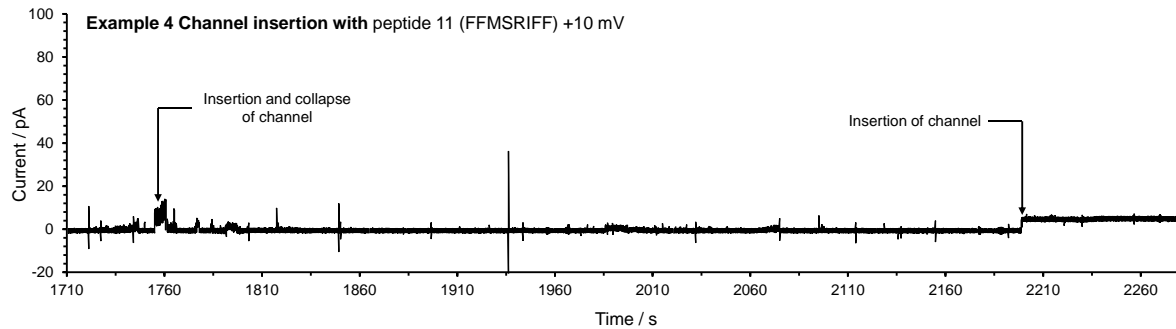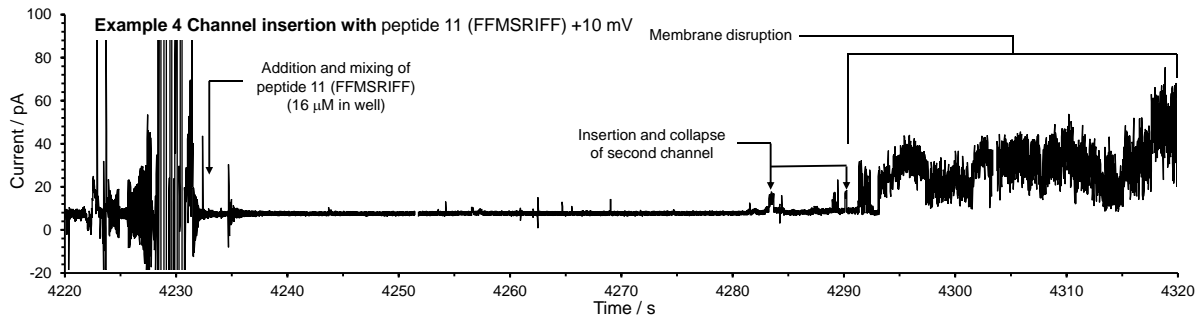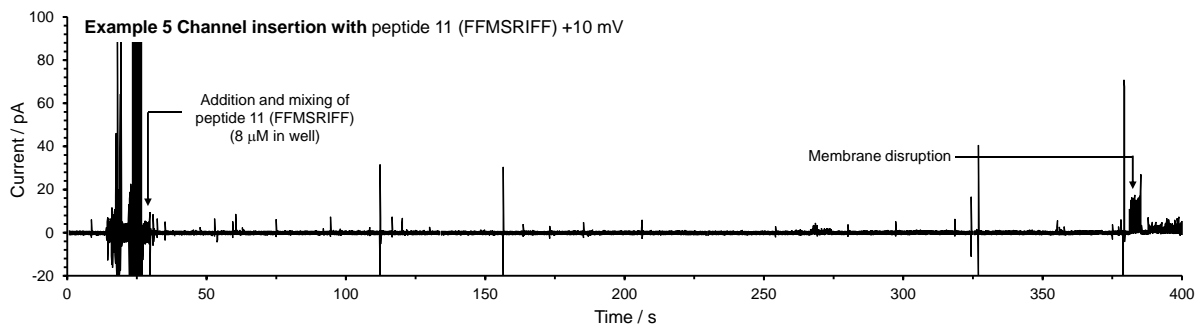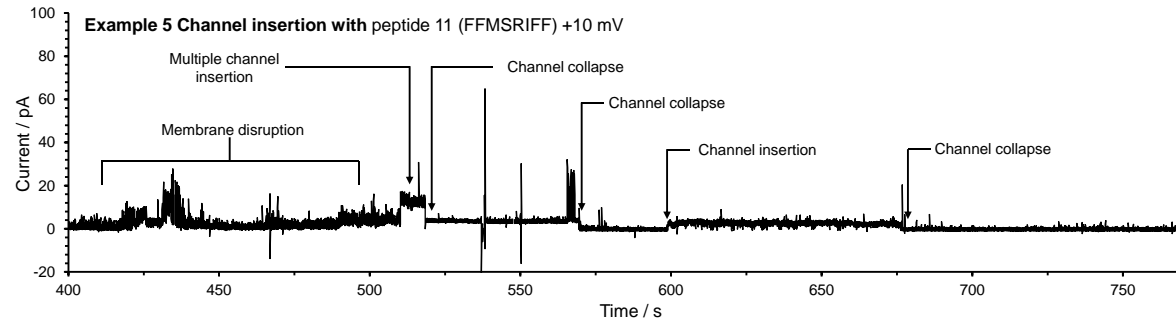

Supporting Information for: An Active Machine Learning Discovery Platform for Membrane-Disrupting and Pore-forming Peptides.

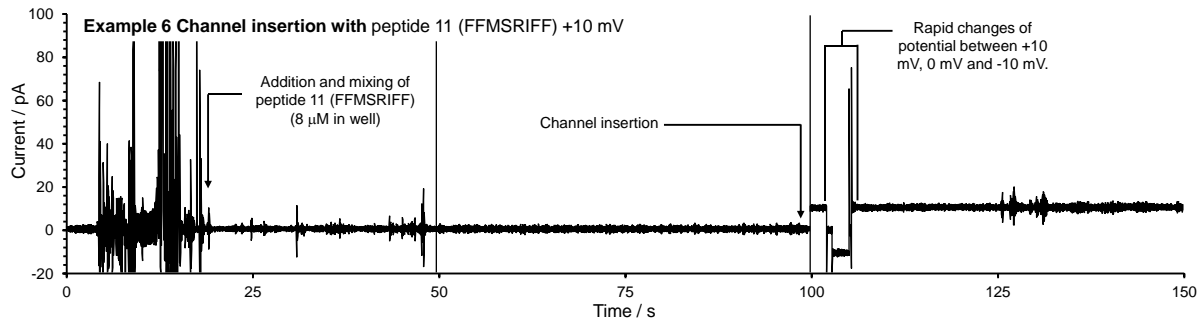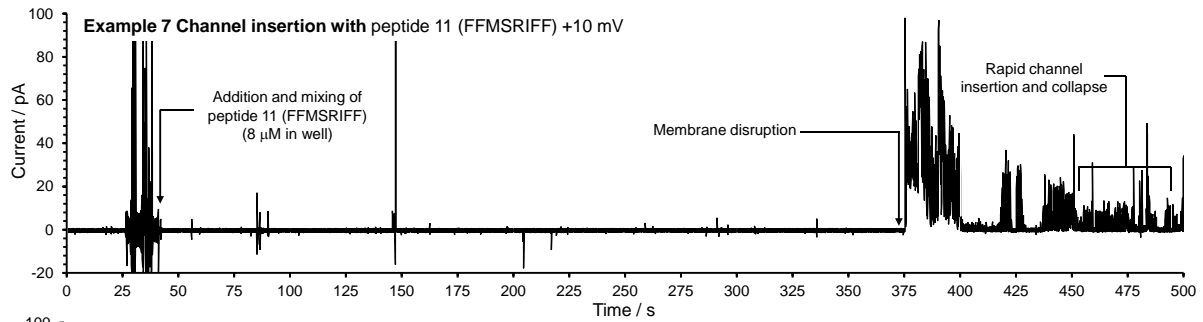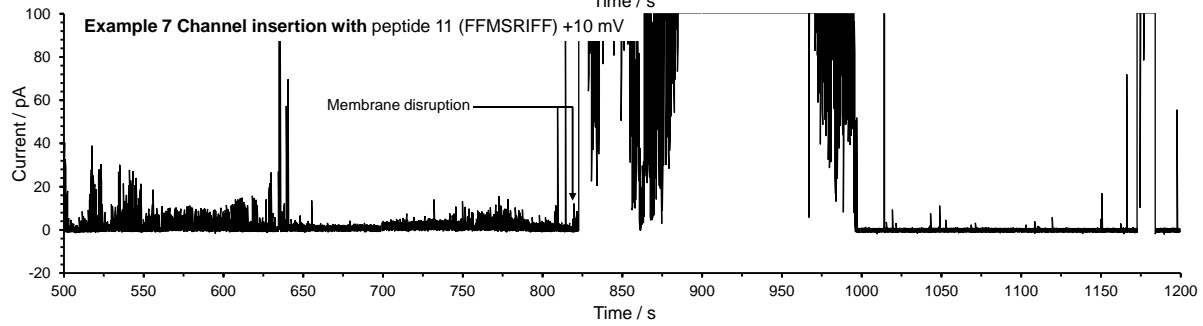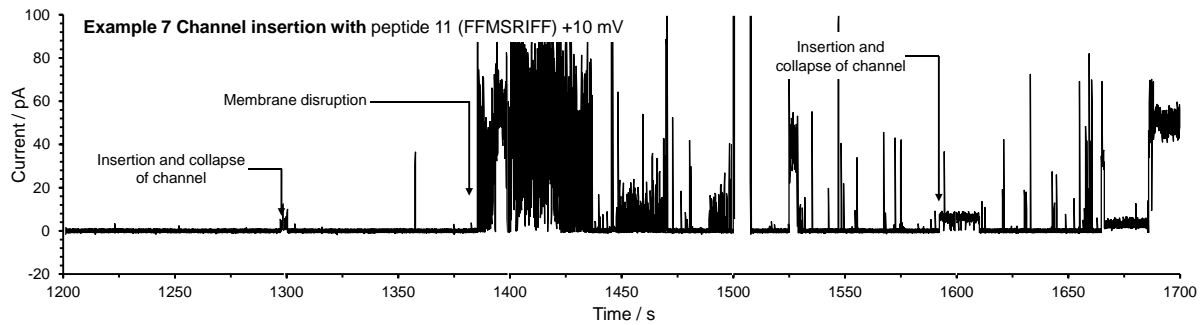

Supporting Information for: An Active Machine Learning Discovery Platform for Membrane-Disrupting and Pore-forming Peptides.

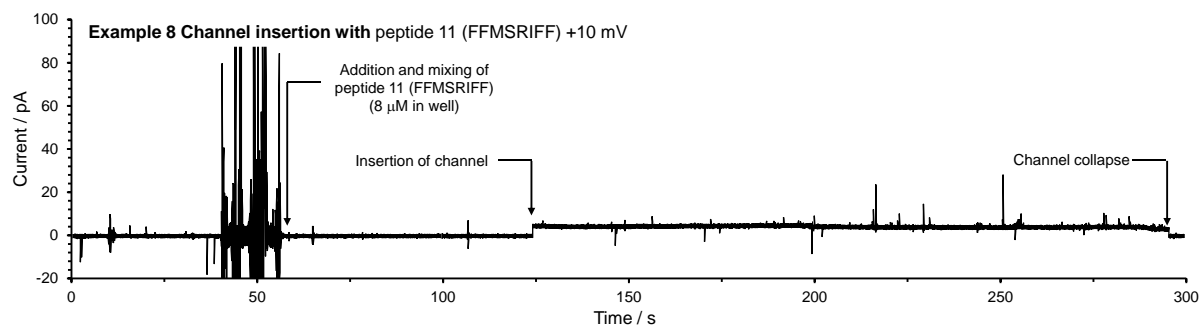

**Supplemental Figure S8 Further examples of channel insertion with peptide 11 FFMSRIFF.** Current traces of membrane disruption with peptide 11 (FFMSRIFF) using 1 M KCl, 10 mM MOPS, pH 7.4. Current traces acquired at 2 kHz lowpass Bessel filter and x 50 output gain. Traces visualized with lowpass filter type (Gaussian) with 750 Hz cut-off. Examples of eight experiments shown each demonstrating channel forming behavior and membrane disruption.

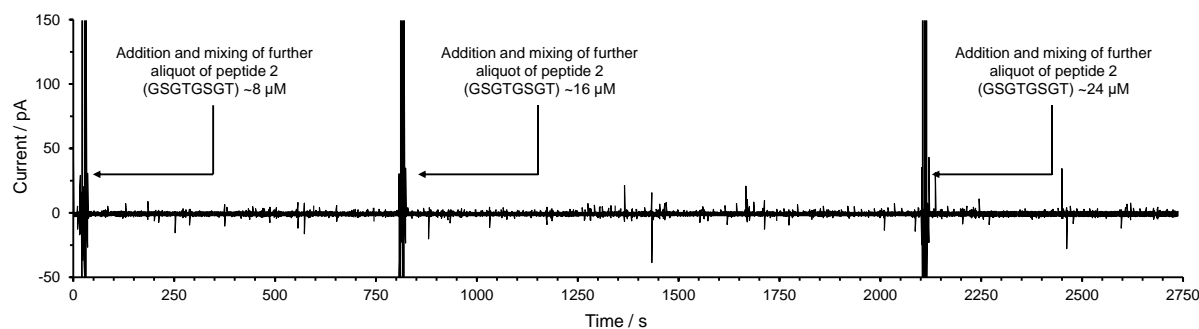

**Supplementary figure S9 Additional data with negative control peptide 2.** Current traces of stable membrane over multiple additions with negative control peptide 2 (GSGTGSGT) using 1 M KCl, 10 mM MOPS, pH 7.4. Current traces acquired at 2 kHz lowpass Bessel filter and x 50 output gain. Traces visualised with lowpass filter type (Gaussian) with 750 Hz cutoff.

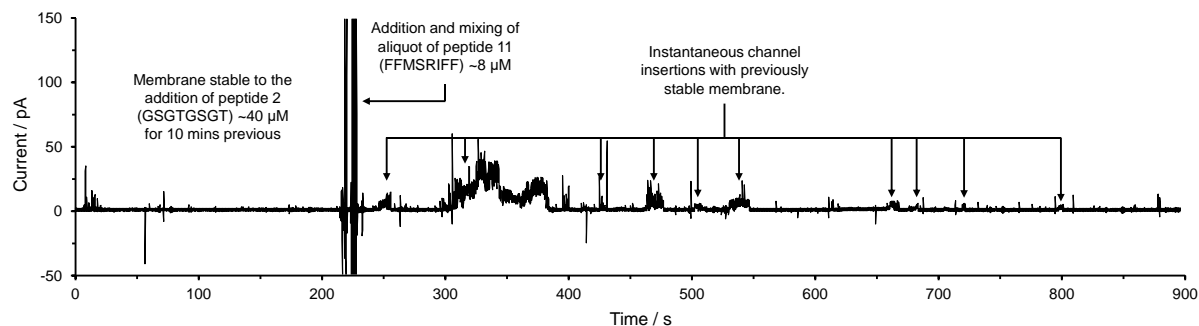

**Supplementary figure S10 Additional data with negative control peptide 2 and then peptide 11.** Current traces of stable membrane over multiple additions with negative control peptide 2 (GSGTGSGT) which then demonstrate sporadic channel formation following the addition of peptide 11 (FFMSRIFF) using 1 M KCl, 10 mM MOPS, pH 7.4. Current traces acquired at 2 kHz lowpass Bessel filter and x 50 output gain. Traces visualised with lowpass filter type (Gaussian) with 750 Hz cutoff.

Supporting Information for: An Active Machine Learning Discovery Platform for Membrane-Disrupting and Pore-forming Peptides.

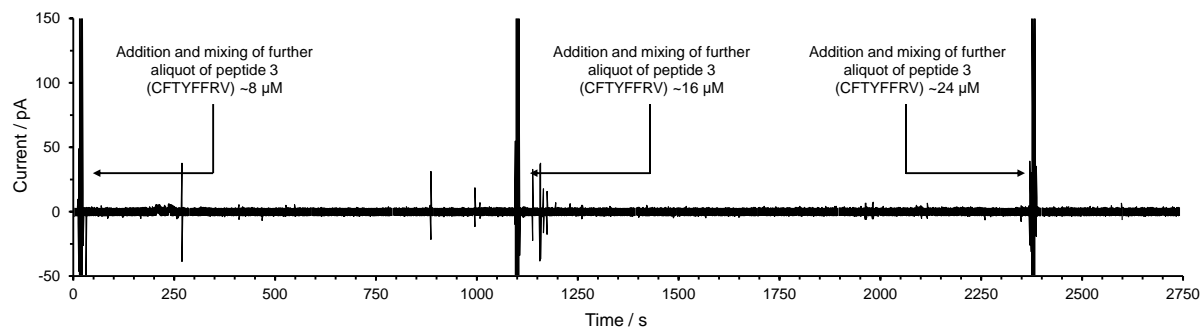

**Supplementary figure S11 Additional data with negative control peptide 3.** Current traces of stable membrane over multiple additions with negative control peptide 3 (CFTYFFRV) using 1 M KCl, 10 mM MOPS, pH 7.4. Current traces acquired at 2 kHz lowpass Bessel filter and x 50 output gain. Traces visualised with lowpass filter type (Gaussian) with 750 Hz cutoff.

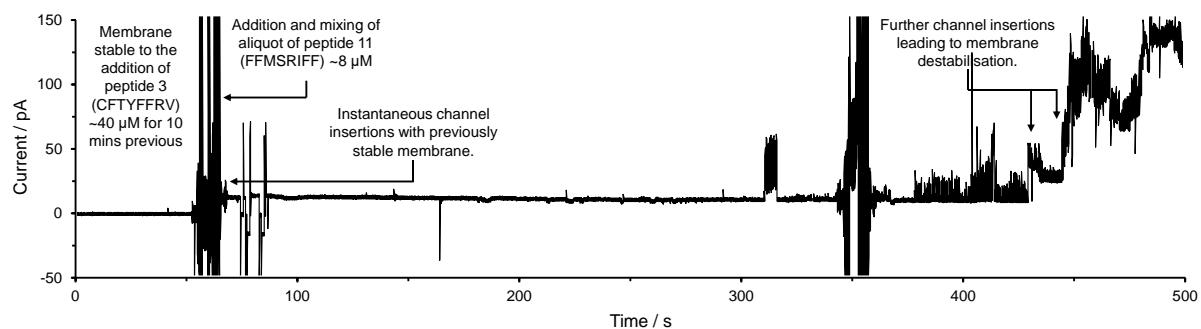

**Supplementary figure S12 Additional data with negative control peptide 3 then peptide 11.** Current traces of stable membrane over multiple additions with negative control peptide 3 (CFTYFFRV) which then demonstrate sporadic channel formation following the addition of peptide 11 (FFMSRIFF) using 1 M KCl, 10 mM MOPS, pH 7.4. Current traces acquired at 2 kHz lowpass Bessel filter and x 50 output gain. Traces visualised with lowpass filter type (Gaussian) with 750 Hz cutoff.

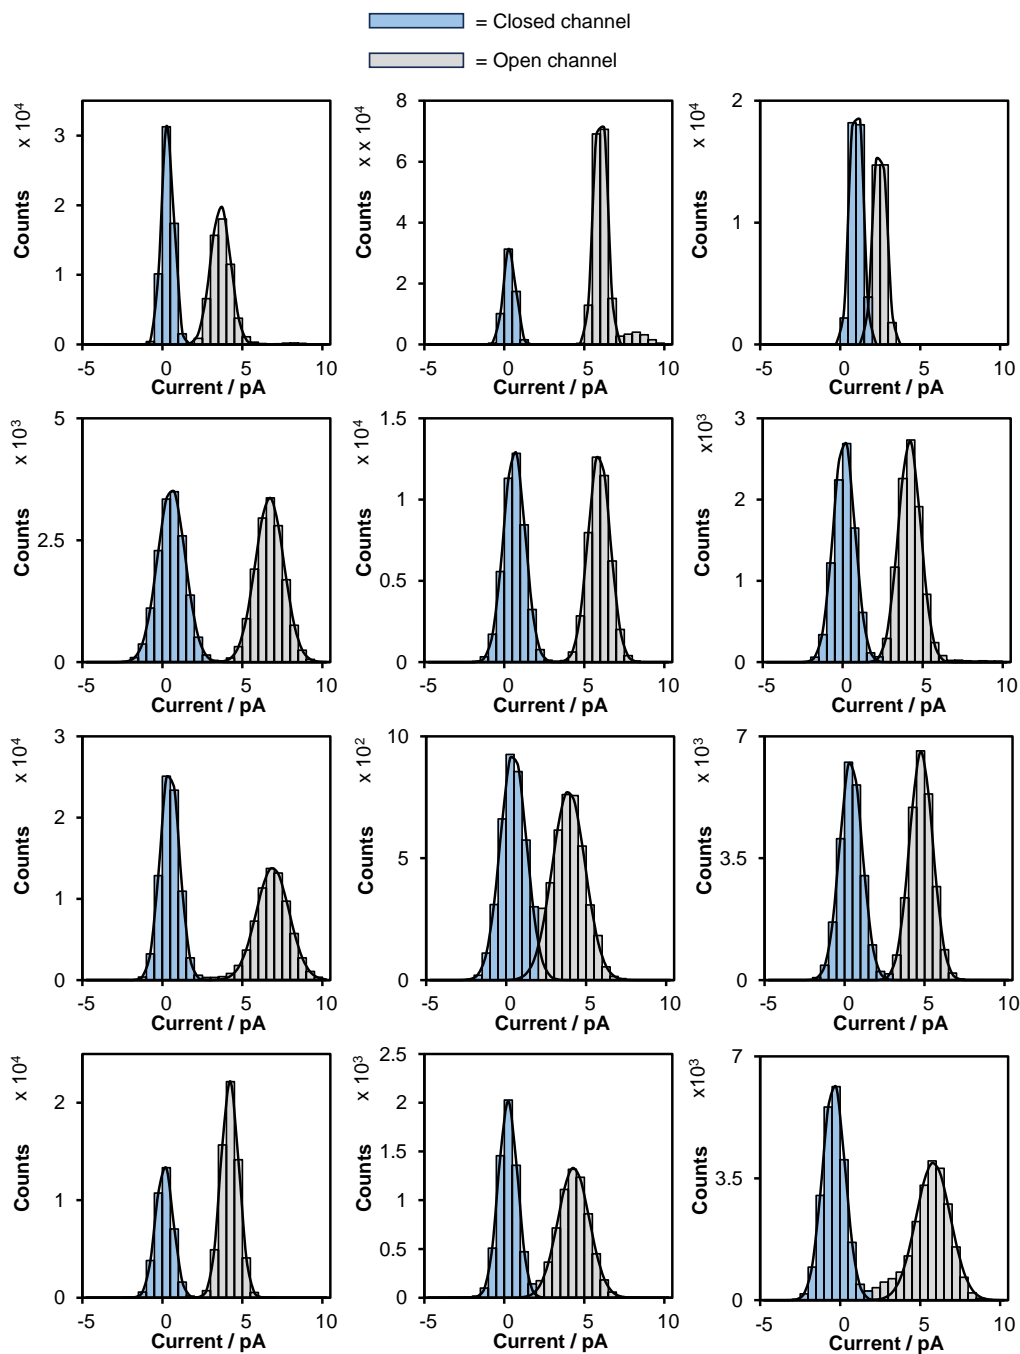

**Supplementary figure S13 Inspection of channel insertion conductance with peptide 11.** Residual ion current histogram distributions of twelve examples of channels observed from the addition of peptide **11** at +10 mV in 1 M KCl, 10 mM MOPS, pH 7.4. Closed channel (blue) and open channel (grey) current distributions interrogated with normal distributions determined by analysis with Solver plugin.

## 2. Computational Simulations

### 2.1 Coarse-grained molecular dynamics

The MARTINI forcefield (version 2.1) parameters for coarse-grained (CG) peptides, phospholipids, water & ions are used with a predefined  $\alpha$ -helical secondary peptide structure<sup>2,3</sup>. The peptide atoms are mapped one-to-four in corresponding heavy atoms-to-beads, water beads represent four water molecules for the purpose of computational efficiency and the ion beads represent one ion. This causes an inevitable loss of detail but leaves a much more computationally efficient method of studying biological systems as the atom properties (polarity, molecular shape, bond lengths etc.) are implied *via* the coarse-grained representation. However, water does not enter pores in the simulations performed herein due to the coarse-grained model being too bulky to allow water to enter. Another consequence of this is that many of our results are sinking rafts as barrel-stave is only accessible if a single peptide can span the bilayer.

Each 12.5×12.5×17.0 nm NPT box was setup with a bilayer of 360 POPC and 90 POPS phospholipids in a bilayer using INSANE<sup>4</sup>. 80 zwitterionic peptides were inserted within 2 nm of the top side of the equilibrated bilayer with at least 0.3 nm between their centers of geometry (COG) with the box neutralized with Na/Cl ions and solvated with MARTINI water. The temperature and pressure were kept constant at 323 K (higher temperature used help to perturb the bilayer)<sup>5</sup> & 1 bar respectively *via* a v-rescale thermostat & Berendsen semiisotropic barostat<sup>6,7</sup>. Bond lengths between backbone and side-chain for peptides I, V & Y as well as within aromatic side chains were constrained *via* the LINCS algorithm.<sup>8</sup> The boxes were minimized using the steepest descent integrator and steered molecular dynamics (SMD) was used to pull peptides. PME electrostatics with an order of 4 and Fourier spacing of 0.12 nm was used for computing long-range electrostatic interactions (Figure S14). Due to the relationship between the diffusion constants of the MARTINI coarse-grained and atomistic simulations, the effective simulation time is 4 times greater than the formal simulation time. Herein we refer to the effective simulation time and not the formal time.

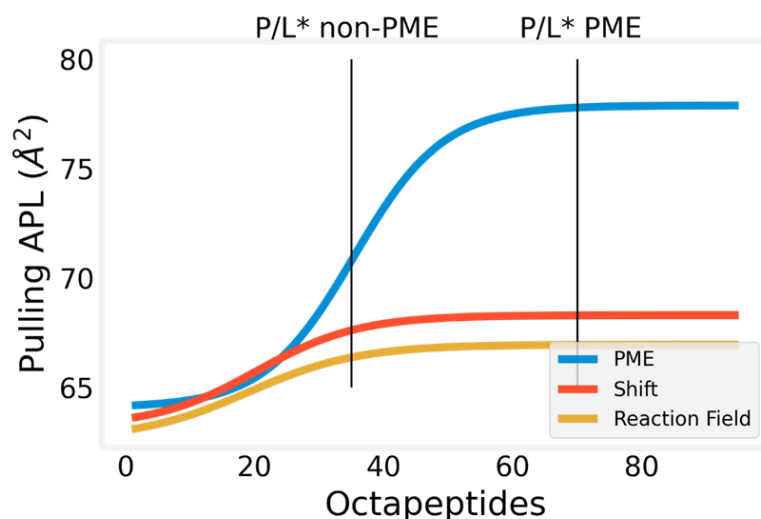

### Supplemental Figure S14 Molecular dynamics electrostatics methods and their effect on peptide-bilayer binding.

A segment of melittin (ALISWIKR) was added to POPC/POPS bilayer simulations using different electrostatic evaluation methods (PME, shift & reaction field). The P/L\* ratios for the short-ranged methods (shift & reaction field) are around 35 while PME allows far more peptides (~ 60) to adsorb onto the surface while increasing APL.

### 2.2 Steered coarse-grained molecular dynamics

Herein we will use a combination of SMD and CGMD for fast and accurate evaluation of peptides that cause increased perpendicular pressure on phospholipid bilayers and increased APL<sup>9</sup>. Peptides are placed within 2 nm of the bilayer and pulled along the Z-axis to allow them to quickly aggregate on the surface. SMD was used to pull

peptides (*via* umbrella sampling) in the Z-dimension towards the bilayer at a constant rate of  $0.1 \text{ kJmol}^{-1}\text{nm}^{-2}$  for 400 ns, followed by relaxation for 400 ns and finally CpHMD for up to 2,000 ns. This technique has previously been used to decrease the equilibration portion of simulations where peptides find their way to the surface of a bilayer<sup>5,10-13</sup>. Following this we relax the simulation by removing the pulling forces, enabling peptides to dissociate.

### 2.2.1 SMD repeatability

With steered molecular dynamics (SMD) there is known to be a lower degree of reproducibility compared with equilibration, therefore when fitting hyperparameters or for any kind of measurement of parameter usefulness we take the averages of 3 runs and use the average of 2 runs for the active learning algorithm. We do find however that since we apply only a very weak force constant our results are quite repeatable (Figure S15).

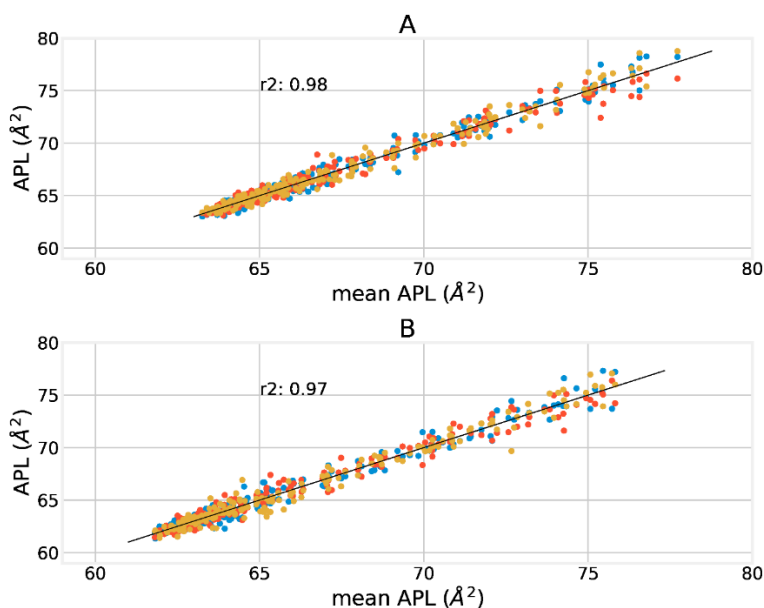

**Supplemental Figure S15 SMD repeatability.** SMD results are highly reproducible between the three runs (blue, orange, red) of the random set of 200 systems in both the pulling (A) and relaxation stages (B).

### 2.3 Constant pH molecular dynamics

To capture a wider range of transitions than are constricted by probability in the original CpHMD algorithm proposed by Radak *et al.* we modified this algorithm, such that the weighted choice of which titratable residue to titrate ( $\lambda \rightarrow \lambda'$ ) is determined by the distance from the bilayer center rather than the theoretical  $pK_a$ . Temperature (311 K) and semiisotropic pressure (1.01325 bar) were coupled using Langevin dynamics<sup>14,15</sup> and a modified Nose-Hoover Langevin piston.<sup>16</sup> The electrostatic interactions were evaluated using particle-mesh Ewald summation and non-bonded LJ terms by a cutoff at 1.2 nm with a shifted modified beginning at 1.0 nm. Each simulation was run at pH 7.0 for up to 2,000 ns or until APL had converged which was made up of 10,000 iterations of 2,000 time steps of 25 fs, at each CGMD iteration a non-equilibrium switch between two titratable states is proposed and run for 200 steps.

$$Weights = \frac{1}{|res_z - bilayer_z|} : res \in \text{titratable residues}$$

## 2.4 Pore-formation via CpHMD

Very few of the SMD+CGMD simulations predicted pore-forming behavior. Hence, CpHMD was used to further simulate the systems starting from the final frame of each CGMD simulation. The CpHMD simulation were found to act as a discriminator of pore-forming behavior; it progresses the formation of pores for some systems while for others not only do pores not form, but peptides also tend to dissociate slightly from the bilayer if they are non-pore-forming (Figure S16 C, D).

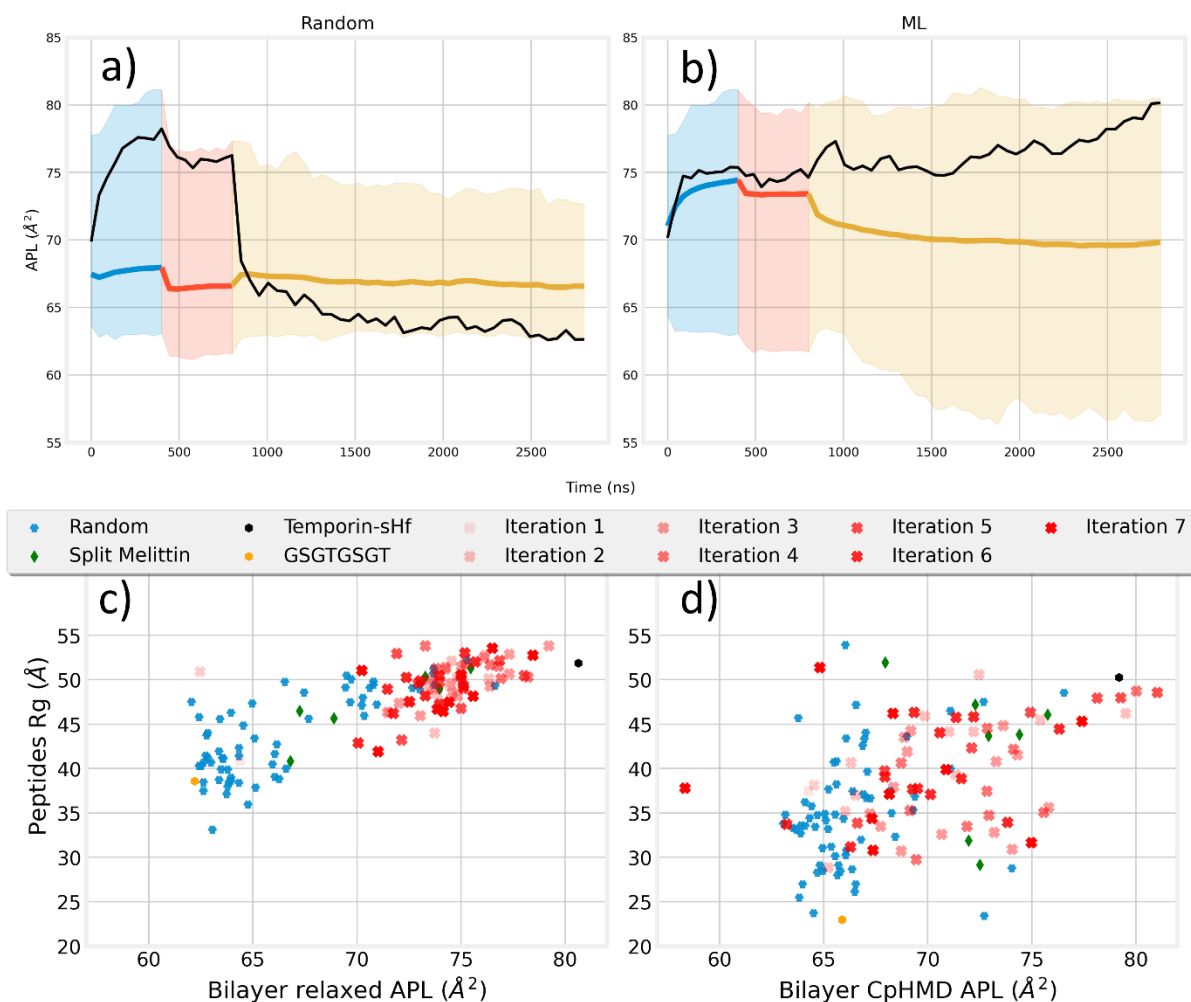

**Supplemental Figure S16 Active learning vs random screening with CpHMD discriminator.** a,b) Bold lines show the mean APL for the three stages, pulling (blue), relaxing (red), CpHMD (yellow) of peptide-bilayer simulation while the filled area shows the range of the random set of octapeptides (a) and machine learning selected (b). The black line is a selected peptide (a: CIIWKWFT, b: FGYVLIRI) from each set demonstrating how CpHMD can significantly alter the result. c,d) Combining APL and  $R_g$  can help to identify PFPs, every octapeptide in the top right corner (d) forms pores or carpets membranes when CpHMD is performed, comparison of (c) & (d) shows that CpHMD is much better at discriminating between pore-forming and inactive octapeptides. The anomalous result of where an octapeptide (FFMSIRFF) has a very low ( $< 60$ ) APL yet is pore-forming demonstrates a short coming of the APL descriptor.



## 2.5 APL as a metric

We scored the ability of each peptide to form transmembrane pores in the CpHMD simulations by assessing the bilayer area-per-lipid (APL). The use APL is based on work by Huang<sup>17</sup> who proposed that transmembrane peptide pores assemble when the peptide-to-lipid ratio (P/L) reaches a critical point (P/L\*). According to this model, thinning of the membrane increases in proportion to the P/L ratio, but remains constant above the critical ratio when pores form. Since membrane thinning increases APL, we anticipated that the APL should provide a measure of the pore-forming ability of a peptide. Hence, we used the APL to score the ability of a peptide to form transmembrane pores. Additional parameters such as radius of gyration ( $R_g$ , Figure S17), solvent accessible surface area (SASA, Figure S19) and aggregation propensity (AP, Figure S20).

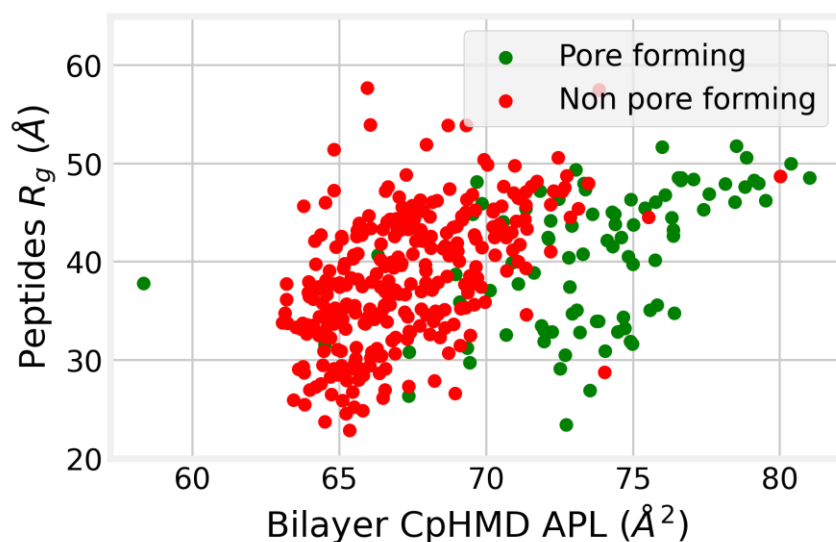

**Supplemental Figure S17 APL and  $R_g$  predictiveness of pore-forming.** Pore-forming ability is strongly correlated with APL but not  $R_g$ , however the  $R_g$  measurement can be useful in determining the nature of the pore(s) formed.

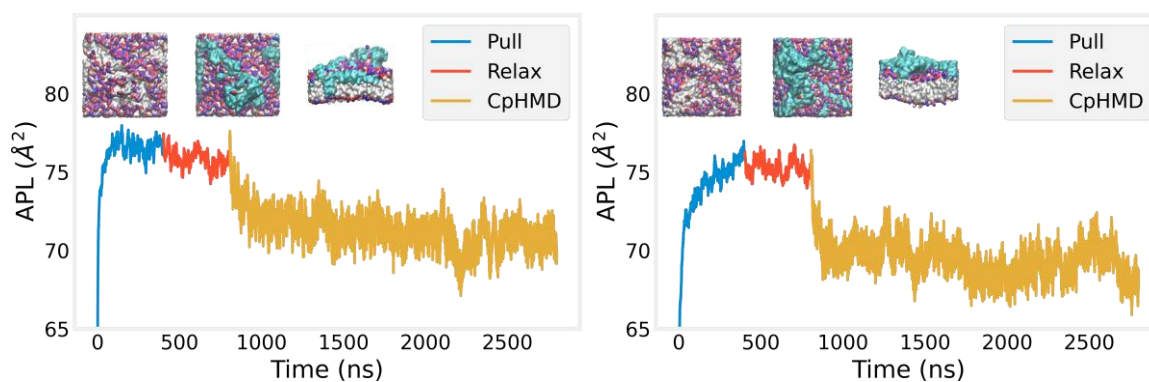

**Supplemental Figure S18 Validation against PFPs found in nature.** Left) Melittin binds with the bilayer surface and forms a pore. Right) LL-37 binds with the bilayer surface but does not enter the bilayer. Both simulations have very similar APL profiles, but manual inspection shows the LL-37 does not form pores while Melittin does.

## Supporting Information for: An Active Machine Learning Discovery Platform for Membrane-Disrupting and Pore-forming Peptides.

We also compared with APL as a metric with solvent accessible surface area (SASA) of the bilayer. Both of these metrics are highly correlated and seem to be able to provide some indication of pore-formation though neither are definitive (Figure S19).

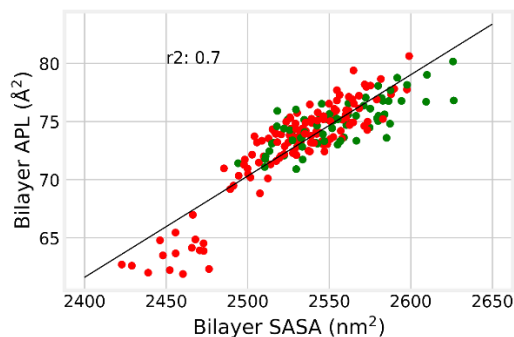

**Supplemental Figure S19 Comparison of using APL and SASA as measurements of bilayer disruption.** While APL is only indicative of pore-forming, the SASA measurement is equally only indicative of pore-formation. This is shown by the red (non-pore-forming) and green (pore-forming) peptide-bilayer system measurements having no clear cut-off point using either method.

We found that the aggregation propensity (AP) of peptides was weakly correlated with the APL score (Figure S20). This result is biased by the starting positions of the peptides being close to the bilayer and close to each other.

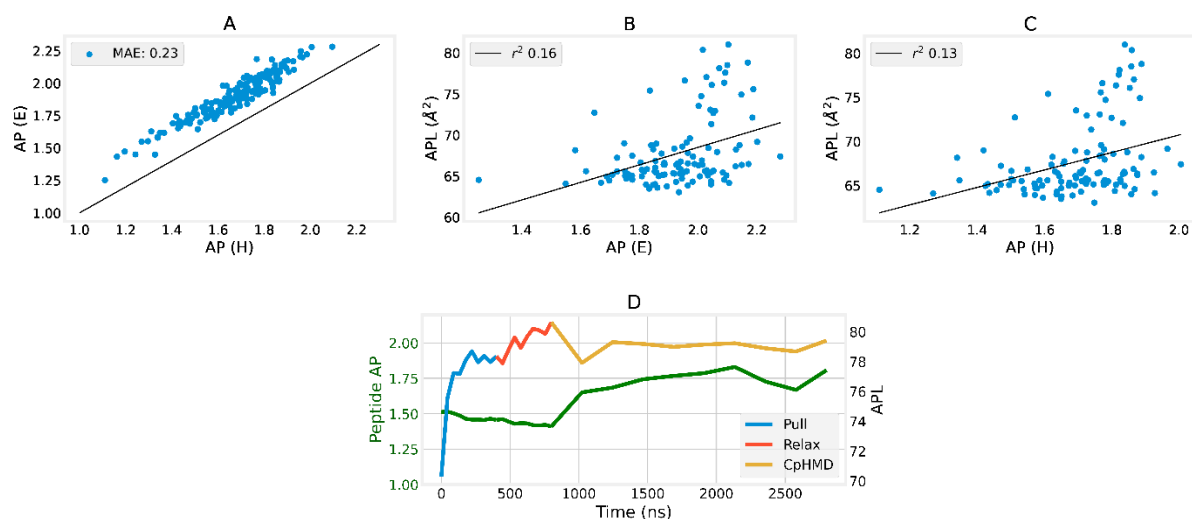

**Supplemental Figure S20 Area per lipid (APL) vs aggregation propensity (AP).** 115 octapeptides randomly selected from the machine learning, random and validation sets. The potential for these peptides to aggregate in water was simulated using the method described by Frederix *et al.*<sup>18</sup> using both helical (H) and extended (E) secondary structure. The aggregation score (AP) was used to quantify the degree of aggregation experienced by each system. A) We find that AP scores for H/E secondary structure is highly correlated, B, C) however neither AP scores correlate strongly with APL with low  $r^2$  scores for a linear trendline. D) This correlation was also compared over the duration of peptide 1 simulations showing only a minor increase in AP score compared to a much larger increase in APL.

## 2.6 Phospholipid bilayers vs stands-ins.

There has been discussion of using model substitutes for phospholipids in peptide-bilayer simulations such as cylamine/octanoic acid, octanol/water, octadecanoic acid/octadecylamine<sup>19</sup>. This is done often to decrease equilibration time as the transition from out of the bilayer to inside of it crosses over a small transition so that the proportions of what's on each side can be realized in less time. However, we find this is inappropriate for searching for PFPs as these, despite being simple peptides, are complex molecules which may be unable to pass the transition barrier formed by the head groups.

## 3. Machine learning / Artificial intelligence

### 3.1 Active learning cycle

We applied our active-learning cycle with three different model combinations (Table S1). Each iteration consists of scanning the entire octapeptide ( $20^8$ ) dataset using the Judred parameters via the cheap model, this is done by loading in each "chunk" of the dataset (2,560,000 rows) and selecting the peptide with highest predicted APL (total of 10,000 peptides). For these 10,000 peptides the higher resolution parameters are generated and a second APL prediction is made via the expensive model. From here either the top 10 are taken or a Monte Carlo (MC) function is applied to the APL predictions by multiplying all values by a random number between 0 and 1 from a uniform distribution.

$$MC = APL \times U(0,1)$$

This has the effect of randomly dropping out top performers to increase diversity while acting on a large enough set so as not to promote any low-to-mid performers to the top of the list. This helps to escape local maxima. These top 10 are simulated and the resulting mean APL measurement for each system (run in duplicate) are used to retrain both models and make the next iteration of prediction. The combinations of machine learning algorithms tested for the Judred dataset screening and higher resolution dataset are given in Table S2.

**Table S2. Machine learning model combinations.** Three combinations of machine learning models used in this study and whether a MC step was used.

| Model | Cheap model | Expensive model | Monte Carlo |
|-------|-------------|-----------------|-------------|
| A     | ETR         | ETR             | X           |
| B     | ETR         | ETR             | ✓           |
| C     | XGB         | ETR             | ✓           |

Many high APL octapeptides were discovered. However, without the Monte Carlo function, model A over-selected for octapeptides containing Tyr, with 66/70 containing at least one Tyr residue and 29/70 containing a YYYY motif. This is due to highly localized optimization and not desirable as we aim to discover PFPs with a diverse range of sequences to better understand sequence-dependent activity.

### 3.2 Machine learning peptide descriptors

Given the previously reported issues with generating large datasets of descriptors for the scales of searching employed herein (octapeptides,  $20^8$ ) using methods that require generating complex molecular representations (Mordred<sup>20</sup>, PyBioMed<sup>21</sup>, PyMolSAR<sup>22</sup> & PaDELPy<sup>23, 24</sup>), we utilize a two-stage strategy that allows the entire octapeptide ( $20^8$ ) space to be examined at a lower resolution (Judred parameters) and to then re-examine with on-the-fly generated higher resolution parameters (Table S3). This method has previously been successfully deployed in iteratively learning which peptides will self-assemble in peptide space up to hexapeptides<sup>25</sup>. To generate the high-resolution dataset, the five molecular descriptor (Judred, Mordred, PyBioMed, PyMolSAR, PaDELPy) programs were used to generate exhaustive (1330) parameters for 200 randomly selected octapeptides and reduced *via* 5-CV reductive feature elimination to 20 remaining features.

Enormous amounts of disk and RAM space are saved by implicit indexing based on position rather than storing peptide sequences, or even explicit indexes. This is achieved by Judred<sup>25</sup> preparing the dataset in an ordered fashion such that any peptide sequence can be calculated by knowing its position in the dataset and the length of the peptide. Since the entire dataset is screened on each iteration this is a feasible scheme that is employed throughout.

The Judred parameters were generated for each peptide with the addition of the isoelectric point (pI) using CuPY<sup>26</sup> and Apache Parquet<sup>27</sup>, with a chunk size of 2,560,000, due to the trade-off in calculation speed and RAM size requirements. The source code which has been made available at <https://github.com/avanteijlingen/Judred>.

**Table S3. Machine learning model metrics comparison.** RMSE and r2 scores for various machine learning algorithms evaluated for use within machine learning. Each model was trained on 200 randomly selected octapeptides and their associated APL scores and validated against a previously unseen validation set of 72 systems with above average APL. Both the ability to predict APL from Judred and Mordred parameters are measured and considered.

|                                 | RMSE  |                       | r2    |                       |
|---------------------------------|-------|-----------------------|-------|-----------------------|
|                                 | Train | High APL (Validation) | Train | High APL (Validation) |
| <b>Judred</b>                   |       |                       |       |                       |
| Extra trees regressor           | 1.25  | 1.93                  | 0.89  | 0.51                  |
| Gradient boosted decision trees | 0.57  | 1.82                  | 0.98  | 0.57                  |
| Random Forest                   | 1.63  | 2.45                  | 0.82  | 0.22                  |
| Decision tree regressor         | 1.3   | 2.13                  | 0.89  | 0.41                  |
| Linear SVM                      | 3.36  | 4.74                  | 0.24  | -1.92                 |
| Linear regressor                | 2.19  | 2.74                  | 0.68  | 0.03                  |
| Gaussian process regressor      | 1.23  | 2.48                  | 0.9   | 0.21                  |
| Elastic Net                     | 3.29  | 4.39                  | 0.27  | -1.5                  |
| NuSVM <sub>rbf</sub>            | 4.06  | 3.37                  | -0.11 | -0.48                 |
| SVM <sub>rbf</sub>              | 2.36  | 3.13                  | 0.62  | -0.27                 |
| SVM <sub>poly</sub>             | 2.23  | 2.9                   | 0.66  | -0.09                 |
| Ridge regressor                 | 2.41  | 2.94                  | 0.61  | -0.12                 |
| Multi-layer perceptron          | 1.52  | 2.1                   | 0.84  | 0.43                  |
| <b>Mordred</b>                  |       |                       |       |                       |
|                                 | Train | High APL (Validation) | Train | High APL (Validation) |
| Extra trees regressor           | 0.97  | 1.74                  | 0.94  | 0.61                  |
| Gradient boosted decision trees | 0.81  | 1.88                  | 0.96  | 0.54                  |

Supporting Information for: An Active Machine Learning Discovery Platform for Membrane-Disrupting and Pore-forming Peptides.

|                                 |       |                       |       |                       |
|---------------------------------|-------|-----------------------|-------|-----------------------|
| Random Forest                   | 1.13  | 1.95                  | 0.91  | 0.51                  |
| Decision tree regressor         | 1.11  | 2.06                  | 0.92  | 0.45                  |
| LinearSVM                       | 2.21  | 2.64                  | 0.67  | 0.09                  |
| Linear regressor                | 1.85  | 2.78                  | 0.77  | 0                     |
| Gaussian process regressor      | 0.46  | 3.38                  | 0.99  | -0.48                 |
| Elastic Net                     | 2.62  | 3.5                   | 0.54  | -0.59                 |
| NuSVM <sub>rbf</sub>            | 4.12  | 3.56                  | -0.15 | -0.64                 |
| SVM <sub>rbf</sub>              | 3.2   | 3.68                  | 0.31  | -0.76                 |
| SVM <sub>poly</sub>             | 2.97  | 3.77                  | 0.4   | -0.85                 |
| Ridge regressor                 | 3.42  | 4.06                  | 0.21  | -1.14                 |
| Multi-layer perceptron          | 2.52  | 4.4                   | 0.57  | -1.51                 |
| Mean of predicted values        |       |                       |       |                       |
|                                 | Train | High APL (Validation) | Train | High APL (Validation) |
| Extra trees regressor           | 1.07  | 1.75                  | 0.92  | 0.6                   |
| Gradient boosted decision trees | 0.68  | 1.83                  | 0.97  | 0.56                  |
| Random Forest                   | 1.32  | 2.09                  | 0.88  | 0.43                  |
| Decision tree regressor         | 1.05  | 1.87                  | 0.93  | 0.54                  |
| LinearSVM                       | 2.52  | 3.49                  | 0.57  | -0.58                 |
| Linear regressor                | 1.94  | 2.68                  | 0.75  | 0.07                  |
| Gaussian process regressor      | 0.76  | 2.49                  | 0.96  | 0.2                   |
| Elastic Net                     | 2.76  | 3.8                   | 0.48  | -0.87                 |
| NuSVM <sub>rbf</sub>            | 4.08  | 3.46                  | -0.12 | -0.55                 |
| SVM <sub>rbf</sub>              | 2.65  | 3.27                  | 0.53  | -0.39                 |
| SVM <sub>poly</sub>             | 2.43  | 3.14                  | 0.6   | -0.28                 |
| Ridge regressor                 | 2.71  | 3.33                  | 0.51  | -0.44                 |
| Multi-layer perceptron          | 1.74  | 2.94                  | 0.8   | -0.12                 |

### 3.3 Machine learning results

Table S4 and S5 contain the results from the machine learning algorithms (Models A-C), Figures S16 & S17 contain top-down snapshots of ML selected bilayers at the end of their CpHMD simulations.

**Table S4. Pore-forming peptides found via active learning.** The 71 PFPs found with the active learning and the model combination that found them, their disruption mechanism and APL and  $R_g$  values. Short peptides are not able to form pores via toroidal or barrel-stave mechanisms as this requires that the peptides enter one-by-one and that they are able to individually span the bilayer. From the 160 position specific residues, many from the top 20 identified occur frequently.

|  | APL (MD) | APL (CpHMD) | $R_g$ | Model | Mechanism | Top residues | Z/AA |
|--|----------|-------------|-------|-------|-----------|--------------|------|
|--|----------|-------------|-------|-------|-----------|--------------|------|

Supporting Information for: An Active Machine Learning Discovery Platform for Membrane-Disrupting and Pore-forming Peptides.

|           |      |      |      |   |              |                |       |
|-----------|------|------|------|---|--------------|----------------|-------|
| FFMSIRFF  | 71.3 | 58.3 | 37.8 | B | Carpet       | F1             | 0.125 |
| QWCIKSKG  | 71.5 | 64.5 | 31.6 | C | Sinking Raft | K5             | 0.25  |
| FSVLFFRW  | 73.4 | 66.3 | 40.7 | B | Sinking Raft | F1, F6, R7     | 0.125 |
| YPKMFAFF  | 72.2 | 67.4 | 30.8 | B | Sinking Raft | -              | 0.125 |
| IKKFYYYY  | 77.9 | 69.1 | 35.9 | A | Sinking Raft | -              | 0.25  |
| GMFFWGKY  | 71.6 | 69.3 | 31.2 | B | Sinking Raft | -              | 0.125 |
| CLWPKQIL  | 76.3 | 69.4 | 29.7 | C | Sinking Raft | K5, L8         | 0.125 |
| KWPFYYRY  | 72.8 | 69.5 | 44.9 | A | Sinking Raft | R7             | 0.25  |
| LIKFYMR   | 73.1 | 69.7 | 48.1 | B | Sinking Raft | -              | 0.25  |
| WCWFSLRW  | 74.6 | 69.8 | 45.9 | B | Sinking Raft | R7             | 0.125 |
| YYMVKLYI  | 74.2 | 70.1 | 37.1 | C | Sinking Raft | V4, K5         | 0.125 |
| YYMVFMRM  | 72.0 | 70.6 | 44.1 | B | Sinking Raft | V4, R7         | 0.125 |
| FWYGFYKF  | 76.4 | 70.7 | 32.6 | B | Sinking Raft | F1             | 0.125 |
| VFHKIVTL  | 75.1 | 70.9 | 39.9 | C | Sinking Raft | L8             | 0.125 |
| MYLMMFRY  | 75.1 | 71.1 | 37.8 | B | Sinking Raft | L3, F6, R7     | 0.125 |
| QWVVKILV  | 73.8 | 71.3 | 45.4 | C | Sinking Raft | V4, K5         | 0.125 |
| VMMRYMF   | 73.8 | 71.6 | 38.9 | B | Sinking Raft | -              | 0.125 |
| LRKCWFFC  | 74.5 | 71.8 | 47.2 | B | Sinking Raft | F6             | 0.25  |
| MKKFYYYY  | 74.5 | 71.9 | 33.5 | A | Sinking Raft | -              | 0.25  |
| LHFVKTVL  | 76.7 | 72   | 33   | C | Sinking Raft | V4, K5, L8     | 0.125 |
| YGIVRFIL  | 77.0 | 72.1 | 42.3 | C | Sinking Raft | G2, V4, F6, L8 | 0.125 |
| MMMFYYRV  | 74.5 | 72.1 | 42.5 | B | Sinking Raft | R7             | 0.125 |
| PYKCFYFG  | 73.3 | 72.2 | 32.9 | B | Sinking Raft | -              | 0.125 |
| YCAFFLRY  | 72.8 | 72.2 | 44.2 | B | Sinking Raft | R7             | 0.125 |
| HGLFWWRF  | 71.8 | 72.5 | 46.4 | B | Sinking Raft | G2, L3, R7     | 0.125 |
| QFLMKCLL  | 77.4 | 72.7 | 30.5 | C | Sinking Raft | L3, K5, L8     | 0.125 |
| PKFYWRYY  | 75.1 | 72.8 | 40.4 | A | Sinking Raft | -              | 0.25  |
| CPWFYMKY  | 72.9 | 72.8 | 37.5 | B | Sinking Raft | -              | 0.125 |
| GIALKIVW  | 73.5 | 72.9 | 34.7 | C | Sinking Raft | K5             | 0.125 |
| QIWMVIKV  | 74.2 | 73.1 | 49.3 | C | Sinking Raft | -              | 0.125 |
| FGFGYPKW  | 75.0 | 73.2 | 32.8 | B | Sinking Raft | F1, G2         | 0.125 |
| VGGFYFKF  | 74.5 | 73.3 | 40.8 | B | Sinking Raft | G2, F6         | 0.125 |
| KPWFYYYYR | 74.3 | 73.3 | 48   | A | Sinking Raft | -              | 0.25  |
| SAFWWFRF  | 74.0 | 73.4 | 47.4 | B | Sinking Raft | F6, R7         | 0.125 |
| FWAFYAKG  | 73.8 | 73.6 | 44.8 | B | Sinking Raft | F1             | 0.125 |
| LHVVKFTL  | 74.5 | 73.8 | 33.9 | C | Sinking Raft | V4, K5, F6, L8 | 0.125 |
| MKKALFGT  | 73.8 | 73.8 | 34   | B | Sinking Raft | F6             | 0.25  |
| TVLYAKFW  | 72.2 | 74   | 30.9 | C | Sinking Raft | L3             | 0.125 |
| FIFMYPRY  | 75.8 | 74.1 | 42.2 | B | Sinking Raft | F1, R7         | 0.125 |
| FFPYGWKG  | 77.8 | 74.3 | 41.5 | B | Sinking Raft | F1             | 0.125 |
| LFVHKVLT  | 79.7 | 74.6 | 42.5 | C | Sinking Raft | K5             | 0.125 |

Supporting Information for: An Active Machine Learning Discovery Platform for Membrane-Disrupting and Pore-forming Peptides.

|           |      |      |      |   |              |                |       |
|-----------|------|------|------|---|--------------|----------------|-------|
| NIFLKLCL  | 75.9 | 74.7 | 33.2 | C | Sinking Raft | K5, L8         | 0.125 |
| VCLWYKVVY | 74.5 | 74.7 | 34.4 | C | Sinking Raft | L3             | 0.125 |
| YLYYKMLI  | 76.1 | 74.8 | 40.5 | C | Sinking Raft | K5             | 0.125 |
| IVTHKVFI  | 75.2 | 74.9 | 31.9 | C | Sinking Raft | K5             | 0.125 |
| YFLIIGRV  | 75.2 | 74.9 | 46.3 | C | Sinking Raft | L3, R7         | 0.125 |
| THIKFVVI  | 73.1 | 75   | 31.7 | C | Sinking Raft | -              | 0.125 |
| ILWPKLIQ  | 75.9 | 75   | 39.8 | C | Sinking Raft | K5             | 0.125 |
| LYGGCKKC  | 71.7 | 75.4 | 45.5 | C | Sinking Raft | -              | 0.25  |
| CGFIKLIV  | 75.1 | 75.6 | 35.1 | C | Sinking Raft | G2, K5         | 0.125 |
| IIFTKHVV  | 75.4 | 75.7 | 40.2 | C | Sinking Raft | K5             | 0.125 |
| YFAAFGKW  | 74.5 | 75.8 | 35.6 | B | Sinking Raft | -              | 0.125 |
| CKKPGLYL  | 75.0 | 76.3 | 44.5 | B | Sinking Raft | L8             | 0.25  |
| HLFVKITV  | 75.7 | 76.4 | 34.8 | C | Sinking Raft | V4, K5         | 0.125 |
| LVIKVFTH  | 78.4 | 76.4 | 42.6 | C | Sinking Raft | F6             | 0.125 |
| IGFVYIRI  | 75.2 | 76.4 | 43.2 | C | Sinking Raft | G2, V4, R7     | 0.125 |
| LMWGRCCA  | 75.0 | 76.6 | 48.3 | C | Sinking Raft | -              | 0.125 |
| VCVYWVRT  | 73.6 | 76.6 | 48.5 | B | Sinking Raft | R7             | 0.125 |
| GLFGCCRF  | 76.5 | 77.1 | 48.4 | C | Sinking Raft | R7             | 0.125 |
| YFCVFFRI  | 74.5 | 77.4 | 45.3 | B | Sinking Raft | V4, F6, R7     | 0.125 |
| IGLYIFRV  | 72.1 | 77.6 | 46.9 | C | Sinking Raft | G2, L3, F6, R7 | 0.125 |
| GVILIFRY  | 72.1 | 78.1 | 47.9 | C | Sinking Raft | F6, R7         | 0.125 |
| IIIWYGKY  | 77.3 | 78.5 | 46.1 | C | Sinking Raft | -              | 0.125 |
| GLYIVFRL  | 76.1 | 78.5 | 51.8 | C | Sinking Raft | F6, R7, L8     | 0.125 |
| VYGFIIIRI | 75.1 | 78.8 | 47.6 | C | Sinking Raft | R7             | 0.125 |
| LCMFMRPI  | 76.0 | 78.9 | 50.6 | C | Sinking Raft | -              | 0.125 |
| LSFMRFFF  | 75.0 | 79.1 | 48.3 | B | Sinking Raft | F6             | 0.125 |
| YCVLRLPF  | 77.3 | 79.3 | 48   | C | Sinking Raft | -              | 0.125 |
| MFIFFSRF  | 75.6 | 79.5 | 46.2 | B | Sinking Raft | R7             | 0.125 |
| IGFIRVLY  | 76.5 | 80.4 | 50   | C | Sinking Raft | G2             | 0.125 |
| FGYVLIRI  | 76.0 | 81   | 48.6 | C | Sinking Raft | F1, G2, V4, R7 | 0.125 |

**Table S5 Peptides found to be non-pore forming.** The 129 non-PFPs found with the active learning, the model combination that found them, and APL and  $R_g$  values. Of the 160 positional residues, very few from the top 20 identified occur.

|          | APL<br>(CpHMD) | $R_g$ | Model | Top<br>residues | Z/AA |          | APL<br>(CpHMD) | $R_g$ | Model | Top<br>residues | Z/AA  |
|----------|----------------|-------|-------|-----------------|------|----------|----------------|-------|-------|-----------------|-------|
| CKKYYYYY | 63.2           | 33.7  | A     |                 | 0.25 | PFRYWKYY | 67.8           | 35.2  | A     |                 | 0.25  |
| GKKFWWIM | 63.2           | 36.2  | B     |                 | 0.25 | IVIYKWYG | 67.9           | 34.6  | C     | K5              | 0.125 |
| QHPSYYYY | 63.2           | 37.7  | A     |                 | 0    | PKWYYFRY | 67.9           | 39.7  | A     | F6, R7          | 0.25  |

Supporting Information for: An Active Machine Learning Discovery Platform for Membrane-Disrupting and Pore-forming Peptides.

|          |      |      |   |    |        |          |      |      |   |    |       |
|----------|------|------|---|----|--------|----------|------|------|---|----|-------|
| WWGSSKMK | 63.9 | 38   | C |    | 0.25   | MKRYFYYY | 67.9 | 39.1 | A |    | 0.25  |
| LTKFFFMM | 64   | 36.5 | B | F6 | 0.125  | WKPFYRY  | 68.1 | 37.1 | A | R7 | 0.25  |
| AAASYYYY | 64.3 | 37.5 | A |    | 0      | RRFKVLWW | 68.1 | 41.4 | C |    | 0.375 |
| QHNEYYYY | 64.3 | 37.5 | A |    | -0.125 | RKKFYYYY | 68.2 | 34   | A |    | 0.375 |
| QHQNYYYY | 64.4 | 37.1 | A |    | 0      | WPKFYRY  | 68.3 | 46.2 | A | R7 | 0.25  |
| AAAADPMC | 64.5 | 38.1 | B |    | -0.25  | PRKFYWYY | 68.4 | 37.9 | A |    | 0.25  |
| QHNNIDWQ | 64.6 | 36.7 | B |    | -0.125 | PFKRWYYY | 68.5 | 41.4 | A |    | 0.25  |
| MWAWWYKG | 64.7 | 39.1 | B |    | 0.125  | RLKHCFCW | 68.6 | 41.6 | B | F6 | 0.25  |
| QHVLHCDT | 64.7 | 26.5 | B |    | -0.125 | PKFRWYYY | 68.7 | 38.5 | A |    | 0.25  |
| QHSYYYYY | 64.8 | 33.7 | A |    | 0      | RRWCMRMV | 68.7 | 53.9 | B |    | 0.375 |
| QHSFGWKW | 64.8 | 37.7 | B |    | 0.125  | GMFWGYKW | 68.7 | 30.7 | B |    | 0.125 |
| RYKSWGYW | 64.8 | 47.2 | A |    | 0.25   | PRKFYYYY | 68.7 | 40.6 | A |    | 0.25  |
| WPKYFYRY | 64.8 | 51.4 | A | R7 | 0.25   | QHRMTPW  | 68.9 | 33.6 | B |    | 0.125 |
| QHSEYYYY | 64.9 | 35.3 | A |    | -0.125 | PKPRYWYY | 68.9 | 43.5 | A |    | 0.25  |
| LKKFYYYY | 65   | 37.5 | A |    | 0.25   | GQLRGWWM | 69   | 41.9 | C | L3 | 0.125 |
| ISTHFWKH | 65   | 37.9 | C |    | 0.125  | PKRYFYWY | 69   | 41.1 | A |    | 0.25  |
| IWQKCSGK | 65   | 30.9 | C |    | 0.25   | QCILVKLW | 69.1 | 31.5 | C |    | 0.125 |
| QHNYYYYY | 65.1 | 42.6 | A |    | 0      | PKFRYYYY | 69.1 | 40.1 | A |    | 0.25  |
| WWTKCGGK | 65.2 | 35.7 | C |    | 0.25   | MCIYFRGY | 69.1 | 35.3 | C |    | 0.125 |
| QHTSENNL | 65.2 | 24.5 | B | L8 | -0.125 | ARKFVWWF | 69.1 | 35.3 | A |    | 0.25  |
| QHQEIWLW | 65.2 | 28   | B |    | -0.125 | PKWFYRY  | 69.2 | 44.3 | A | R7 | 0.25  |
| WWCMKSGK | 65.2 | 28.9 | C | K5 | 0.25   | IQWWGRMG | 69.2 | 44.6 | C |    | 0.125 |
| QHTSYYYY | 65.5 | 29.7 | A |    | 0      | PWFYRKY  | 69.3 | 53.9 | A |    | 0.25  |
| NKKFWYAW | 65.5 | 35.3 | A |    | 0.25   | YMYRMMVF | 69.3 | 46.3 | B |    | 0.125 |
| QHVNYYYY | 65.5 | 29.1 | A |    | 0      | YMMVYRFM | 69.3 | 37.7 | B | V4 | 0.125 |
| RHKMCWCW | 65.6 | 31.3 | B |    | 0.25   | PYKRFYWW | 69.4 | 38.6 | A |    | 0.25  |
| MRKFYYYY | 65.7 | 43.9 | A |    | 0.25   | RVKFAFW  | 69.5 | 38.4 | A |    | 0.25  |
| QHMYEILC | 65.8 | 24.9 | B |    | -0.125 | RGKFFWMM | 69.5 | 46.8 | B | G2 | 0.25  |
| WWCTGKKG | 66   | 35.2 | C |    | 0.25   | KKIYYYYY | 69.5 | 32.5 | A |    | 0.25  |
| PYFWKRY  | 66.1 | 37.9 | A | K5 | 0.25   | MFYLMRMY | 69.5 | 37.8 | B |    | 0.125 |
| PWKYFYRY | 66.3 | 38.8 | A | R7 | 0.25   | IVITKVHF | 69.6 | 45.2 | C | K5 | 0.125 |
| MKKYYYYY | 66.3 | 31.2 | A |    | 0.25   | QHRIYYYY | 69.6 | 39.5 | A |    | 0.125 |
| PKKFYYYY | 66.5 | 35.4 | A |    | 0.25   | PAKFHWRW | 69.6 | 35.7 | B | R7 | 0.25  |
| YRKSWGYW | 66.5 | 37   | A |    | 0.25   | KPKFYYYY | 69.6 | 42.3 | A |    | 0.25  |



Supporting Information for: An Active Machine Learning Discovery Platform for Membrane-Disrupting and Pore-forming Peptides.

|          |      |      |   |            |       |          |      |      |   |        |       |
|----------|------|------|---|------------|-------|----------|------|------|---|--------|-------|
| KKMFYYYY | 66.5 | 43.3 | A |            | 0.25  | RRLRWILW | 69.9 | 50.4 | C | L3     | 0.375 |
| QHRHYVQT | 66.6 | 44.1 | B |            | 0.125 | KLKFYFFF | 69.9 | 41.5 | A |        | 0.25  |
| PYWYKRFY | 66.6 | 47.6 | A | K5         | 0.25  | IMQRGWGG | 70   | 49.9 | C |        | 0.125 |
| ARKMFYMW | 66.6 | 33.9 | B |            | 0.25  | MYLMFYRM | 70   | 35.9 | B | L3, R7 | 0.125 |
| KIKFYFFF | 66.7 | 44.3 | A |            | 0.25  | HRRGWGGW | 70.2 | 43.6 | A |        | 0.25  |
| HRKPWCWM | 66.7 | 35.7 | B |            | 0.25  | MVISWWRV | 70.3 | 42.5 | B | R7     | 0.125 |
| LPFMYRFF | 66.7 | 36.3 | B | R7         | 0.125 | SFIFMRFF | 70.3 | 40.7 | B |        | 0.125 |
| KMKFYFFF | 66.9 | 32.3 | A |            | 0.25  | KRMFYFFF | 70.4 | 43.8 | A |        | 0.25  |
| KVKFYFFF | 66.9 | 44.4 | A |            | 0.25  | KFKHWYFA | 70.5 | 43.5 | A |        | 0.25  |
| PFKRYFFW | 67   | 46.6 | A |            | 0.25  | PWKFYFFR | 70.6 | 47.7 | A |        | 0.25  |
| PFKYRWYF | 67   | 40.5 | A |            | 0.25  | KLPFYFFR | 70.7 | 42.5 | A | R7     | 0.25  |
| KRKFYFFF | 67.1 | 44.3 | A |            | 0.375 | RWHIRIVI | 70.9 | 41.2 | C |        | 0.25  |
| KQKFGYWW | 67.1 | 45.5 | A |            | 0.25  | CFTYFFRV | 71   | 44.1 | B | F6, R7 | 0.125 |
| PWRVYFKY | 67.1 | 39.9 | A |            | 0.25  | KIPRYFFF | 71   | 49.8 | A |        | 0.25  |
| GVKGWVWF | 67.2 | 34.9 | B |            | 0.125 | MMGYMRYF | 71.1 | 41.8 | C |        | 0.125 |
| PWKRYFFV | 67.2 | 44.8 | A |            | 0.25  | VRHIRLIW | 71.3 | 45.8 | C |        | 0.25  |
| PSKGWVFF | 67.3 | 34.4 | B |            | 0.125 | RRVIWRWL | 71.3 | 44.3 | C | L8     | 0.375 |
| RKMFYFFF | 67.3 | 32.2 | A |            | 0.25  | RIRRVWLW | 71.3 | 47.1 | C |        | 0.375 |
| PYWFRKYY | 67.3 | 43.3 | A |            | 0.25  | TCPFFWRY | 71.3 | 39.3 | B | R7     | 0.125 |
| KMKAGLWT | 67.5 | 44.4 | B |            | 0.25  | KWPYRYFF | 71.4 | 43.4 | A |        | 0.25  |
| RRPVMWCK | 67.5 | 44.9 | B | V4         | 0.375 | VRRWRLLW | 72.2 | 45.8 | C |        | 0.375 |
| MLFFRSFF | 67.6 | 43.5 | B |            | 0.125 | MYMMRIFY | 72.2 | 41   | B |        | 0.125 |
| SIKHFVMI | 67.6 | 42.1 | B |            | 0.125 | WGFCAIRQ | 72.5 | 50.6 | C | G2, R7 | 0.125 |
| PKRFYFFW | 67.7 | 33.5 | A |            | 0.25  | RVHIRLWI | 72.6 | 47.2 | C |        | 0.25  |
| RHRGWGGW | 67.8 | 45.2 | A |            | 0.25  | MIMFYMRY | 72.8 | 44.5 | B | R7     | 0.125 |
| KHKMVMWV | 67.8 | 37   | B |            | 0.25  | QHPCWRVA | 73.5 | 48   | B |        | 0.125 |
| KAKFYHYW | 67.8 | 43.3 | A |            | 0.25  | SMTFFWRI | 75.5 | 44.5 | B | R7     | 0.125 |
| FGCFFWRW | 80   | 48.7 | B | F1, G2, R7 | 0.125 |          |      |      |   |        |       |

Supporting Information for: An Active Machine Learning Discovery Platform for Membrane-Disrupting and Pore-forming Peptides.

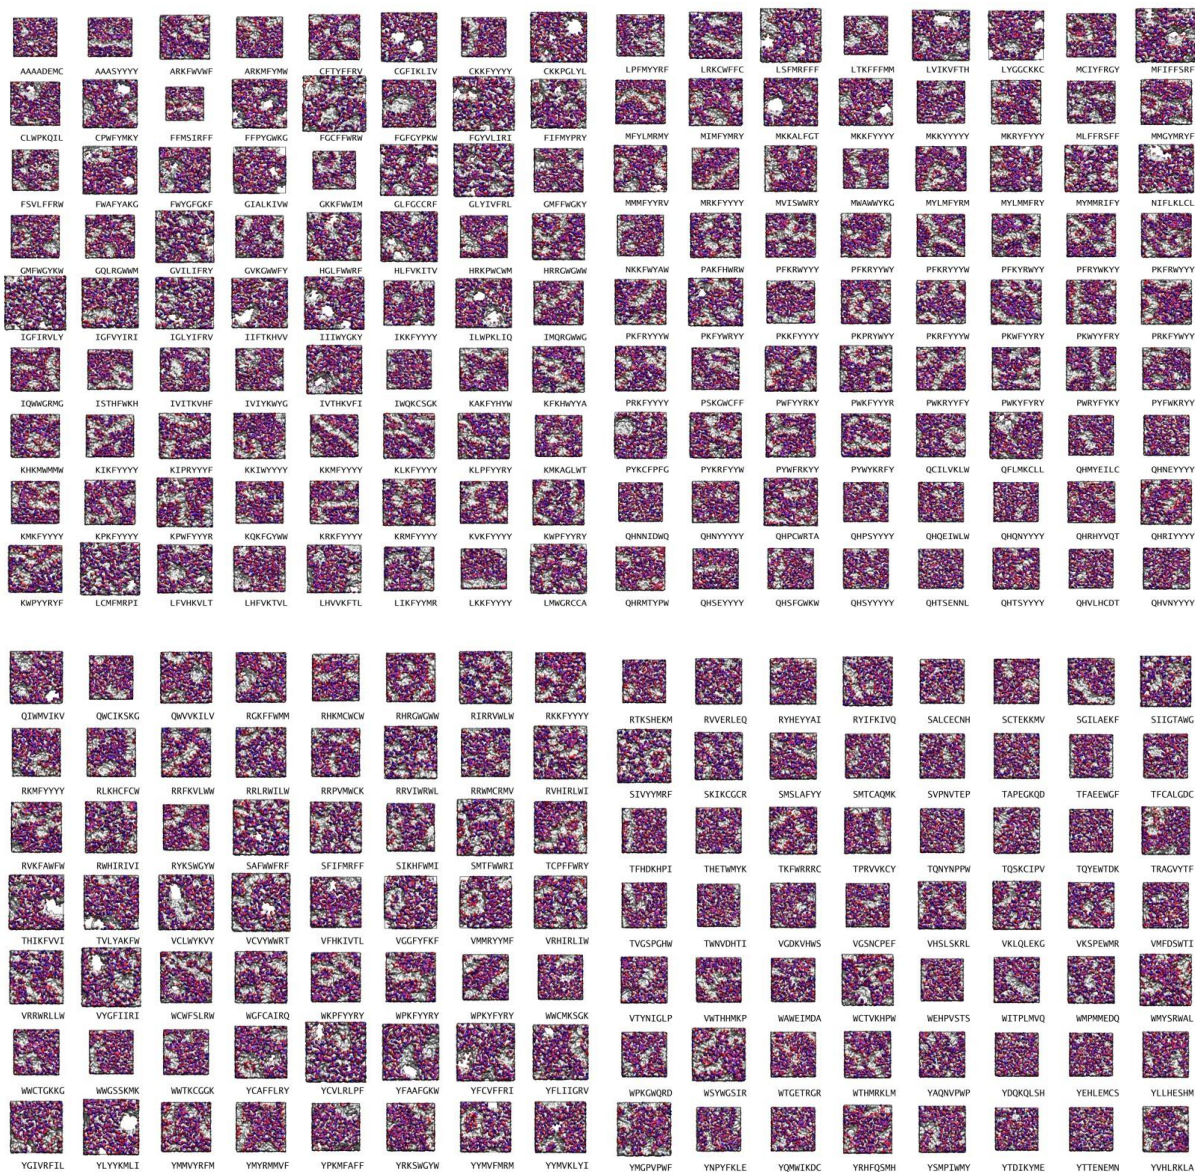

**Supplemental Figure S21 Additional peptide-bilayer snapshots.** Snapshots of randomly selected peptide-bilayer systems at the end of each simulation, peptides have been removed to better show their effect on the bilayers.

Supporting Information for: An Active Machine Learning Discovery Platform for Membrane-Disrupting and Pore-forming Peptides.

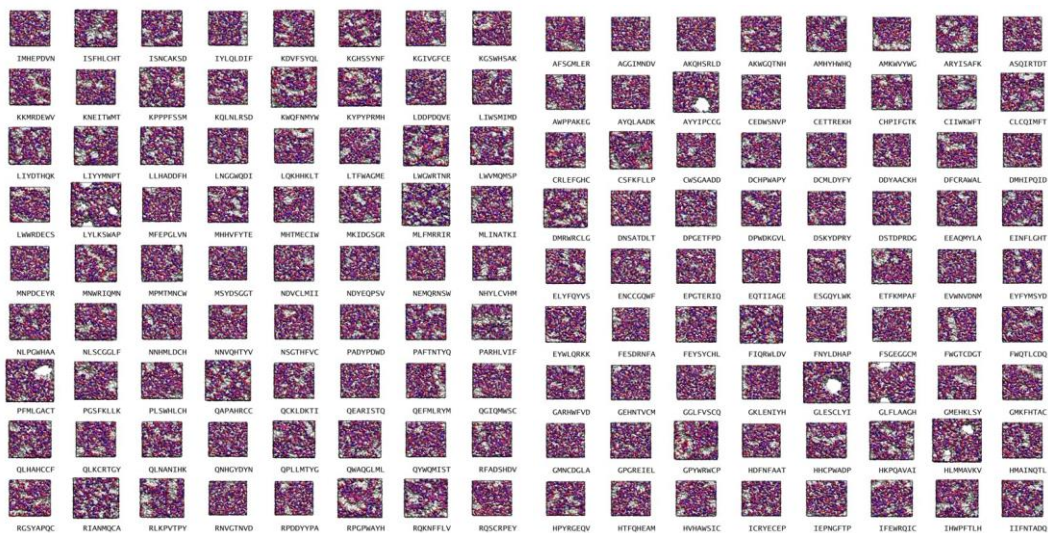

**Supplemental Figure S22 Additional peptide-bilayer snapshots.** Snapshots of randomly selected peptide-bilayer systems at the end of each simulation, peptides have been removed to better show their effect on the bilayers.

### 3.3.1 Machine learning model improvement over time

All three active learning paradigms (Table S2) showed rapid improvement in ability to select for high APL scoring peptides, including the ability to correct for a relatively bad set of predictions (Figure S23).

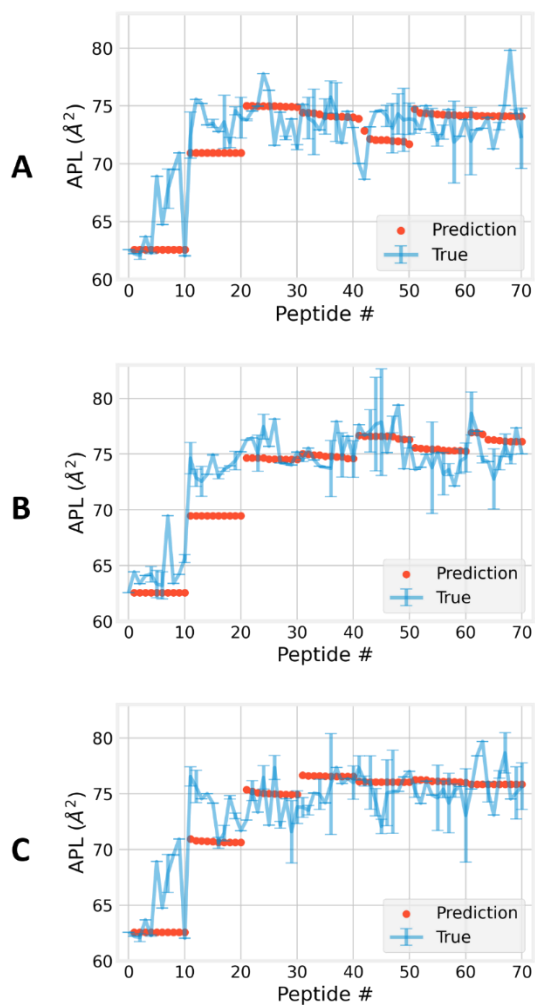

**Supplemental Figure S23 Active learning iterations.** Iterative cycle of predicting and testing the top performing peptides with the results of the predicted (red) and measured APL values from duplicate runs (blue) for our three model combinations of models A, B and C.

### 3.4 Machine learning acceleration

To determine the relative acceleration of using the active learning algorithm described herein we compare the random set of 200 peptides with the active learning algorithms' peptides. We find that the active learning algorithms initially do not outperform random screening during the early phases where the models are learning the chemical space. However, as the active learning models improve the rate of discovery (active peptides found vs simulations performed) increases (Figure S24).

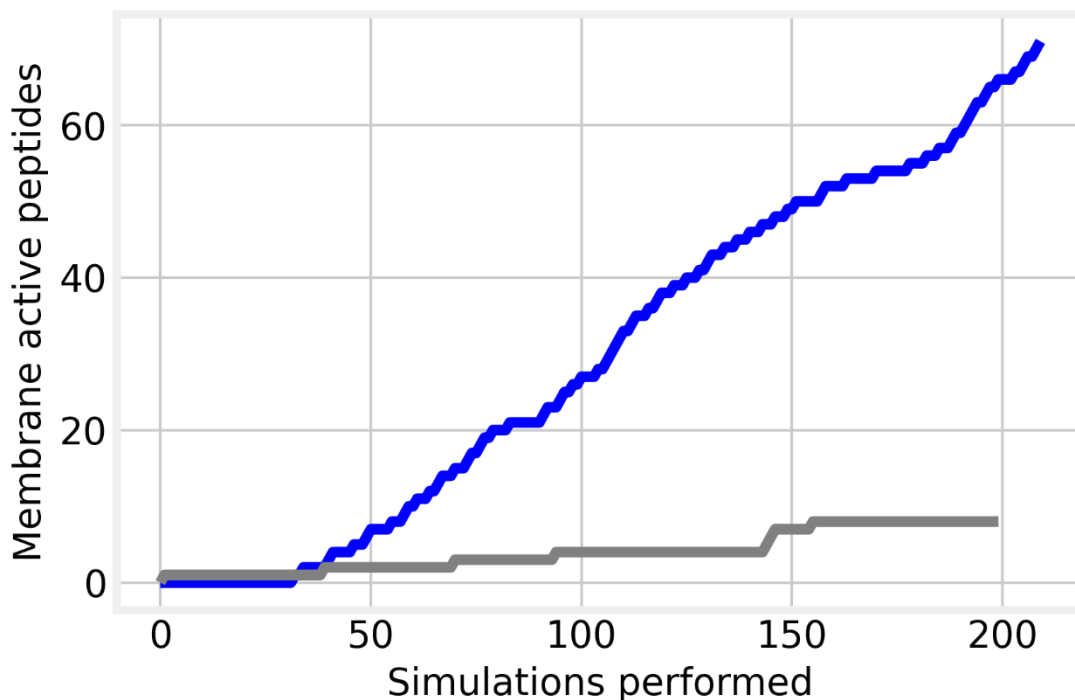

**Supplemental Figure S24 Active learning vs random selection.** The rate of discovery of membrane active peptides is low for random screening (grey) as well the initial stages of active learning where the peptide selections are no better than random. However, as the active learning models (blue) improve the rate of discovery of membrane active peptides increases dramatically.

#### 4. Data underpinning this publication

All data underpinning this publication are openly available from the University of Strathclyde KnowledgeBase at [doi.org/10.15129/e9b5fb03-b07a-46d2-9336-14cfaa1fea31](https://doi.org/10.15129/e9b5fb03-b07a-46d2-9336-14cfaa1fea31)

#### 5. Supplemental References

1. K. R. Mahendran, Springer US, 2021, vol. 2186, pp. 19-32.
2. S. J. Marrink, H. J. Risselada, S. Yefimov and D. P. a. Tieleman, *J. Phys. Chem. B*, 2007, **111**, 7812--7824.
3. L. Monticelli, S. K. Kandasamy, X. Periole, R. G. Larson, D. P. Tieleman and S. J. Marrink, *J. Chem. Theory Comput.*, 2008, **4**, 819--834.
4. T. A. Wassenaar, H. I. Inglfsson, R. A. Bckmann, D. P. Tieleman and S. J. Marrink, *J. Chem. Theory Comput.*, 2015, **11**, 2144--2155.
5. A. J. Rzepiela, D. Sengupta, N. Goga and S. J. Marrink, *Faraday Discuss.*, 2010, **144**, 431--443.
6. G. Bussi, D. Donadio and M. Parrinello, *J. Chem. Phys.*, 2007, **126**, 014101.
7. H. J. C. Berendsen, J. P. M. Postma, W. F. van Gunsteren, A. DiNola and J. R. Haak, *J. Chem. Phys.*, 1984, **81**, 3684-3690.
8. B. Hess, *J. Chem. Theory Comput.*, 2008, **4**, 116-122.
9. M. Sonora, E. E. Barrera and S. Pantano, *Biochim. Biophys. Acta, Biomembr.*, 2022, **1864**, 183804.
10. K. P. Santo, S. J. Irudayam and M. L. Berkowitz, *J. Phys. Chem. B*, 2013, **117**, 5031-5042.
11. S. J. Irudayam and M. L. Berkowitz, *Biochim. Biophys. Acta*, 2012, **1818**, 2975-2981.
12. L. Thogersen, B. Schiott, T. Vosegaard, N. C. Nielsen and E. Tajkhorshid, *Biophys. J.*, 2008, **95**, 4337-4347.
13. E. Han and H. Lee, *RSC Advances*, 2015, **5**, 2047-2055.
14. N. Goga and A. J. a. Rzepiela, *J. Chem. Theory Comput.*, 2012, **8**, 3637--3649.
15. J. A. Lzaguirre, D. P. Catarello, J. M. Wozniak and R. D. Skeel, *J. Chem. Phys.*, 2001, **114**, 2090--2098.
16. S. E. Feller, Y. Zhang, R. W. Pastor and B. R. Brooks, *J. Chem. Phys.*, 1995, **103**, 4613--4621.
17. H. W. Huang, *Biochim. Biophys. Acta*, 2006, **1758**, 1292-1302.
18. P. W. Frederix, G. G. Scott, Y. M. Abul-Haija, D. Kalafatovic, C. G. Pappas, N. Javid, N. T. Hunt, R. V. Ulijn and T. Tuttle, *Nat. Chem.*, 2015, **7**, 30-37.
19. M. J. Davila and C. Mayer, *Life (Basel)*, 2022, **12**.
20. H. Moriwaki, Y. S. Tian, N. Kawashita and T. Takagi, *J. Cheminformatics*, 2018, **10**, 4.
21. J. Dong, Z. J. Yao, L. Zhang, F. Luo, Q. Lin, A. P. Lu, A. F. Chen and D. S. Cao, *J. Cheminformatics*, 2018, **10**, 16.
22. R. Avadhoot, PyMolSAR, <https://github.com/BeckResearchLab/PyMolSAR> ,urldate = 2021-06-01).
23. T. Kessler, PaDELPy: A Python wrapper for PaDEL-Descriptor software, <https://github.com/ECRL/PaDELPy> ,urldate = 2021-06-01).
24. C. W. Yap, *J. Comput. Chem.*, 2011, **32**, 1466-1474.
25. A. Van Teijlingen and T. Tuttle, *J. Chem. Theory Comput.*, 2021, **17**, 3221-3232.
26. Okuta, Ryosuke, Unno, Yuya, Nishino, Daisuke, Hido, Shohei, Loomis and Crissman, presented in part at the Proc. Work. Mach. Learn. Syst. Thirty-first Annu. Conf. Neural Inf. Process. Syst., 2017.
27. D. Vohra, in *Practical Hadoop Ecosystem*, Apress, Berkeley, CA, 2016, ch. 8, pp. 325-335.
